# Supplementary material for: circHIPK3 nucleates IGF2BP2 and functions as a competing endogenous RNA
Source: eLife. 2024 Jul 23;13:RP91783. doi: 10.7554/eLife.91783 (PMC11265796; doi:10.7554/eLife.91783)
Supplement: Supplementary file 4. [file elife-91783-supp4.xlsx]

## Sheet: UMUC3_24h
7mer	miRNA	Rank	Motif score
CCCTGCC	miR-1207-5p	1	-133.184
CCCCTGC	miR-1909-3p	2	-92.4688
CCCCAGC	miR-4731-5p	3	-90.3191
GCCCCCA	#N/A	4	-80.7203
GGCCCCC	#N/A	5	-75.4356
AGGCCCC	#N/A	6	-73.5879
CCCCCAG	miR-637	7	-64.3533
GGCAGCC	#N/A	8	-62.948
CTGGAGA	#N/A	9	-50.6982
GGCCTCA	#N/A	10	-47.2647
TGGGGCG	#N/A	11	-46.228
GGCCAGG	#N/A	12	-45.3895
CTGCAGG	#N/A	13	-44.6697
TCCCCTG	#N/A	14	-44.3903
GTGGCCA	miR-588	15	-43.3631
GCAGCCT	#N/A	16	-40.1258
CTTCCTG	#N/A	17	-38.6196
TGGCCTC	#N/A	18	-36.3024
GCCAGAG	#N/A	19	-35.7465
GCAGGTG	#N/A	20	-34.414
CCCACCA	#N/A	21	-34.3835
GGCTCAG	miR-1199-5p	22	-33.9599
TCCTCCC	miR-7106-5p	23	-33.5684
AGCAGCT	#N/A	24	-33.2766
CAGCACC	#N/A	25	-32.9026
TGGCCAC	#N/A	26	-32.8428
AGTGGCC	#N/A	27	-30.7097
GCAGCTC	miR-558	28	-30.5321
CGGCCAG	#N/A	29	-29.9139
CCCAGCG	#N/A	30	-28.8862
CGGCAGC	#N/A	31	-28.2884
TGGCCAG	miR-3190-5p	32	-27.3219
CCTGCCA	miR-7150	33	-25.2758
GTCCCCT	#N/A	34	-24.2774
CTGCCAC	#N/A	35	-23.8194
CTGCACT	#N/A	36	-23.063
GCTCAGG	#N/A	37	-22.5831
GTGCTGT	#N/A	38	-22.5038
AAGGCCC	#N/A	39	-22.3419
GGGCGTG	#N/A	40	-21.1609
ACCCACC	miR-6769a-5p	41	-20.5627
CCACAGG	#N/A	42	-19.6912
ATGGCCT	miR-15a-3p	43	-19.2705
GGCGTGG	#N/A	44	-19.2407
GTGCAGG	#N/A	45	-18.8357
GGCCACT	miR-3677-5p	46	-18.1229
CAGGTGC	miR-6804-3p	47	-17.8786
TGCAGGC	#N/A	48	-17.8377
CAGCGCA	#N/A	49	-17.5023
CGGCCCA	#N/A	50	-17.3334
CGAGGAC	#N/A	51	-17.1212
CTCCCAC	miR-1233-5p	52	-16.6483
CCACTGC	#N/A	53	-16.6211
GGAGAAG	#N/A	54	-16.4312
GCCAGGT	#N/A	55	-15.7851
CTTTGGG	miR-186-3p	56	-15.5112
CAGCCTT	#N/A	57	-15.3563
CTCAGGC	#N/A	58	-15.3207
GGCCAGT	miR-193a-3p	59	-15.2887
GCCTCAC	miR-4316	60	-15.1197
TGCTGGA	#N/A	61	-14.9996
GGCACAG	miR-6889-3p	62	-14.8949
TCCTGCA	#N/A	63	-14.8144
GTCGGCC	#N/A	64	-14.6957
TTGGGGC	miR-5699-5p	65	-14.4411
GCACAGC	#N/A	66	-14.3669
GCAGCGC	#N/A	67	-14.3181
TCGAGGC	#N/A	68	-14.0577
AGAGCCA	miR-8057	69	-13.9374
AGCAGCG	#N/A	70	-13.9136
GAGAAGG	#N/A	71	-13.8359
AGGGACA	#N/A	72	-13.4946
CTCGAGG	#N/A	73	-13.2581
GCGTGGC	#N/A	74	-13.1111
GAAGGCC	#N/A	75	-12.6562
TTCCAGG	#N/A	76	-12.6084
CCTGTTC	#N/A	77	-12.5001
CCTCCCA	miR-30b-3p	78	-12.4862
TTCCTGC	#N/A	79	-12.4769
AGAGGGA	miR-642a-5p	80	-12.3013
TCCAGGA	#N/A	81	-12.0175
GCTCACG	#N/A	82	-11.972
AGCCAGA	#N/A	83	-11.7548
TGAGGAG	#N/A	84	-11.4886
CGGACCT	#N/A	85	-11.4123
GAGGACA	#N/A	86	-11.4056
GGGGCGT	#N/A	87	-11.3918
GAGGGAC	#N/A	88	-11.32
GAGTGAG	#N/A	89	-11.3169
CCTCGAG	#N/A	90	-11.3158
TCGGCCC	miR-6877-5p	91	-11.3051
TCGGCAG	#N/A	92	-11.0971
GCCAAGC	#N/A	93	-10.9968
AGTGCCT	#N/A	94	-10.9736
GATGCTG	#N/A	95	-10.924
GCAGGCA	miR-6894-3p	96	-10.7464
TGCCCGT	#N/A	97	-10.5912
AGTGAGC	#N/A	98	-10.559
CCACGGA	#N/A	99	-10.2605
TCCCACT	#N/A	100	-10.2004
AGCTCAG	#N/A	101	-10.0501
TCGGCCA	#N/A	102	-9.97075
GGGTCGG	#N/A	103	-9.89464
TATGGCC	#N/A	104	-9.74611
AGCCAAG	#N/A	105	-9.67802
TGGTGGA	#N/A	106	-9.5519
GACAGCT	#N/A	107	-9.25129
AAGAGGG	#N/A	108	-9.01816
AGGTGCT	#N/A	109	-9.01285
GAAGGTG	#N/A	110	-8.94675
TCCACGG	#N/A	111	-8.85257
ACTGGAG	miR-3925-3p	112	-8.68352
CGAGGCA	#N/A	113	-8.66698
GGCACCT	#N/A	114	-8.55708
CAGCTAC	#N/A	115	-8.47556
TGCAGGT	#N/A	116	-8.46718
CGTGCAG	#N/A	117	-8.15861
GTGAGGA	#N/A	118	-7.92379
AGTCCCC	miR-4652-5p	119	-7.86876
GTCCTTG	#N/A	120	-7.82379
AAGCCAG	#N/A	121	-7.74683
GCCCGTC	#N/A	122	-7.69214
CCTCACA	#N/A	123	-7.68173
GGACACA	#N/A	124	-7.59483
AGCAAGG	#N/A	125	-7.56698
GCCACTG	miR-5693	126	-7.457
AGGCACG	#N/A	127	-7.43507
GGCCCAT	#N/A	128	-7.33775
CATCCTC	miR-3605-5p	129	-7.31181
AGGCTCA	#N/A	130	-7.30166
TGCTCCA	#N/A	131	-7.24899
CAGGGTT	miR-6732-3p	132	-6.86716
GCCAGTC	#N/A	133	-6.65592
GTGCCTT	miR-124-3p	134	-6.56491
AGTGAGG	#N/A	135	-6.53288
GTGACAG	miR-6773-3p	136	-6.53184
AGCACCG	miR-1250-5p	137	-6.46406
CCTCAGA	#N/A	138	-6.24106
CCAGCGA	#N/A	139	-6.15876
CAGCTCA	#N/A	140	-6.05831
AGACCTC	#N/A	141	-5.76285
AGGAGTT	#N/A	142	-5.74022
GCACCGT	#N/A	143	-5.67041
GCAAGGC	#N/A	144	-5.65249
GAGGAGT	#N/A	145	-5.61439
TCCAGTG	#N/A	146	-5.54861
CAAGTGC	#N/A	147	-5.47075
TGGGTCG	miR-551a	148	-5.43394
GATGTGG	#N/A	149	-5.38672
CCCGTCA	#N/A	150	-5.35753
CAGCAAG	#N/A	151	-5.16269
GAAGCGC	#N/A	152	-5.15805
CACGTGC	#N/A	153	-5.11616
CTGGAAC	#N/A	154	-4.99923
CAAGCAG	#N/A	155	-4.98542
CCACTGG	#N/A	156	-4.96239
TGCAGAC	#N/A	157	-4.94841
ACTGCAC	miR-143-5p	158	-4.86565
GGTCGGC	#N/A	159	-4.8607
CTTTGAG	#N/A	160	-4.84347
GTCGAGG	#N/A	161	-4.78689
CCAGAGA	miR-3191-5p	162	-4.61544
GCACCTC	#N/A	163	-4.59702
CAAGCCA	#N/A	164	-4.55701
TTGGGTC	#N/A	165	-4.50796
GTCTTGG	#N/A	166	-4.49344
CAAGGCT	#N/A	167	-4.37992
CAGGATC	#N/A	168	-4.3
CCAGGAA	#N/A	169	-4.28748
CAGGCAC	miR-550a-5p	170	-4.14925
ACGGACC	#N/A	171	-4.12688
AGGACAC	#N/A	172	-4.09905
CCAGTGA	miR-653-3p	173	-4.02424
AGAAGGT	#N/A	174	-4.00065
CGTGGCG	#N/A	175	-3.9618
CACTGGA	#N/A	176	-3.91791
CAAGGTC	#N/A	177	-3.90871
ACGAGCT	#N/A	178	-3.90411
CAGTGAC	#N/A	179	-3.87744
GAGGCAC	#N/A	180	-3.77133
TACGAGC	#N/A	181	-3.69874
GCAGACA	miR-632	182	-3.67522
TCACGTG	#N/A	183	-3.66976
TGACAGC	#N/A	184	-3.66531
CAAGTGG	#N/A	185	-3.62442
CTTTCTG	#N/A	186	-3.55267
CTCCATG	#N/A	187	-3.52707
CGCAAGA	#N/A	188	-3.50702
AGGTGAC	#N/A	189	-3.49992
CTCATCC	miR-1255a	190	-3.48475
TCGAGGA	#N/A	191	-3.46323
GATCCTG	#N/A	192	-3.3945
TCAGGCA	#N/A	193	-3.36514
GCTGGAA	#N/A	194	-3.34249
CTCAAGC	#N/A	195	-3.30183
ATCCACG	#N/A	196	-3.27058
GAGTTGG	#N/A	197	-3.23657
TGGAGAA	#N/A	198	-3.22243
AAGTGGC	#N/A	199	-3.19711
CACGGAC	#N/A	200	-3.14679
CACAGGA	#N/A	201	-3.13589
GCGCAAG	#N/A	202	-3.12803
AGAAGGC	#N/A	203	-3.12493
AAGGCTC	#N/A	204	-3.04417
TCAGCAC	#N/A	205	-2.92672
GGTGGAT	#N/A	206	-2.89503
GTCAAGG	#N/A	207	-2.88677
TGAAGCG	#N/A	208	-2.87982
GGGACAA	miR-4646-3p	209	-2.87266
TCGGTAC	#N/A	210	-2.80568
GTGAGCA	miR-1178-3p	211	-2.80029
AGCAAGC	#N/A	212	-2.76627
CACAGCA	#N/A	213	-2.64735
GACCTCG	#N/A	214	-2.63371
GAGATGC	#N/A	215	-2.54517
ACCACAG	#N/A	216	-2.38443
GTACGAG	#N/A	217	-2.3498
TCCTTCT	#N/A	218	-2.27412
ATGCTGG	miR-338-3p	219	-2.23521
TGGATCC	#N/A	220	-2.11862
CTTGGTC	#N/A	221	-2.07677
CTCAGTC	miR-6857-3p	222	-2.06437
CGTTTGG	#N/A	223	-2.05374
ATGCCCG	#N/A	224	-1.9946
AAAGGTC	miR-6759-3p	225	-1.9606
GCTGATG	#N/A	226	-1.93065
GCTCAGT	#N/A	227	-1.92093
GCTCCAT	#N/A	228	-1.91541
TACCCAC	#N/A	229	-1.88132
TAGAGCC	miR-6822-3p	230	-1.8274
CTACCCA	miR-1229-5p	231	-1.82054
AGGCACC	#N/A	232	-1.76623
CGAGCTT	miR-99a-3p	233	-1.67387
CCAAGCA	#N/A	234	-1.65219
CACCTCA	#N/A	235	-1.64068
TCAAGCC	#N/A	236	-1.63111
CAGCATG	#N/A	237	-1.5601
AGCGCAA	#N/A	238	-1.53517
GGATCCT	miR-4661-3p	239	-1.48934
GTGGCGA	miR-6788-3p	240	-1.45106
CCACCAT	#N/A	241	-1.37206
GATTGGG	#N/A	242	-1.35699
CAGCGAT	#N/A	243	-1.32328
GTAGAGC	#N/A	244	-1.24326
CCTGCAA	#N/A	245	-1.20729
TTCGGCA	#N/A	246	-1.18567
CATCCTT	#N/A	247	-1.15441
GAGCCAA	#N/A	248	-1.15406
GGTGACT	#N/A	249	-1.15113
CAAGCTC	#N/A	250	-1.14066
GGCACGT	#N/A	251	-1.13236
AGGCACA	miR-550b-2-5p	252	-1.10765
TTGTCGA	#N/A	253	-1.07963
TCATCCT	#N/A	254	-1.06806
CCTTCTT	#N/A	255	-1.05184
TGGCGAA	#N/A	256	-1.05135
AGCGATG	#N/A	257	-0.93843
CGTCAAG	#N/A	258	-0.92525
CATGCTG	#N/A	259	-0.911122
ACAGGAT	#N/A	260	-0.905545
ATCTCGG	#N/A	261	-0.90356
ACTTCCT	#N/A	262	-0.836681
AGGGTAG	#N/A	263	-0.794181
TGTCCAT	#N/A	264	-0.779848
CTCGGTA	#N/A	265	-0.76385
TCTACCC	miR-197-5p	266	-0.750505
CGATGAA	#N/A	267	-0.746777
ATCCTCC	miR-6894-5p	268	-0.66838
TTGTACG	#N/A	269	-0.647728
CCCATTC	#N/A	270	-0.643304
TCTCATC	#N/A	271	-0.627433
GCTGATC	#N/A	272	-0.613715
TCGATGA	#N/A	273	-0.608228
CTAAGGG	#N/A	274	-0.608195
ACGTGCA	#N/A	275	-0.588353
ATTCGGC	#N/A	276	-0.584002
TCTCGGT	miR-4523	277	-0.564684
GATTCGG	#N/A	278	-0.552987
AAGGTCA	#N/A	279	-0.542113
CTCACGT	#N/A	280	-0.52918
AAGGTGA	#N/A	281	-0.506734
ACATGGG	#N/A	282	-0.496208
GTCGATG	#N/A	283	-0.482194
GGTCGAG	#N/A	284	-0.479814
ATCATCC	#N/A	285	-0.44197
TTCGGCC	#N/A	286	-0.421033
ACCTCGA	#N/A	287	-0.404262
TGTCGAT	#N/A	288	-0.395683
GCGATGT	#N/A	289	-0.393781
CGATGTG	#N/A	290	-0.365173
CTGATCT	#N/A	291	-0.337343
GCGAAAC	#N/A	292	-0.286883
ATCCTTC	#N/A	293	-0.248317
CGGTACT	#N/A	294	-0.24793
GCAAGAG	#N/A	295	-0.202886
TCAAGGT	#N/A	296	-0.191438
CCCACTA	miR-4727-3p	297	-0.184399
TACGAAG	#N/A	298	-0.167016
AAGTCCT	miR-8083	299	-0.166101
CACCGTA	#N/A	300	-0.15895
ACGAAGT	#N/A	301	-0.128505
CTGTTCG	#N/A	302	-0.127399
TGGTCGA	#N/A	303	-0.108509
GGTCTAC	#N/A	304	-0.100132
AAGCGCA	#N/A	305	-0.0970739
ACTTACG	#N/A	306	-0.0909844
TGATTCG	#N/A	307	-0.0867229
TGTTCGG	#N/A	308	-0.0795601
TGAGATG	#N/A	309	-0.0708773
CGAAGTC	#N/A	310	-0.0622084
AGCTACC	#N/A	311	-0.0586867
CCGTCAA	#N/A	312	-0.0503539
GTTCGGC	#N/A	313	-0.0473939
ATGCTCC	#N/A	314	-0.0436838
TGTACGA	#N/A	315	-0.043517
CGCAATG	#N/A	316	-0.0326903
ACCGTAA	#N/A	317	-0.0127895
GATCTCA	#N/A	318	-0.00823729
GCAAACC	#N/A	319	-0.00277033
CAGAGAA	#N/A	320	0.0141625
GCGCAAT	#N/A	321	0.0285777
ATAGACC	#N/A	322	0.0529438
GCACGTT	#N/A	323	0.0799151
TTACGAA	#N/A	324	0.0894976
GACAAAG	#N/A	325	0.0915845
CATGGGA	#N/A	326	0.109287
GAAGTCC	#N/A	327	0.157938
CGAAACA	#N/A	328	0.17423
CAGACAA	#N/A	329	0.18421
AAGCTCA	#N/A	330	0.205902
TTGGTCG	#N/A	331	0.23062
GGACCTA	#N/A	332	0.246813
ATGTGGA	#N/A	333	0.257747
GTCTACC	miR-379-5p	334	0.260711
GCCCATT	#N/A	335	0.267839
TCTACAA	miR-3674	336	0.32859
TGTGACA	#N/A	337	0.332683
GGTGCTA	miR-5682	338	0.337642
CTTCAAC	#N/A	339	0.34088
CGTAACC	#N/A	340	0.402933
CAACAAG	#N/A	341	0.446792
AATCTCG	#N/A	342	0.494309
TCTCAAG	#N/A	343	0.551497
GGCGAAA	#N/A	344	0.553399
AATCCAG	miR-378j	345	0.597911
TCAACAT	#N/A	346	0.601685
TGATCTC	#N/A	347	0.610854
TCAGACA	#N/A	348	0.635173
AGACAAG	#N/A	349	0.652785
AGCTCAC	#N/A	350	0.746218
CTGCAAT	#N/A	351	0.770994
GACACAA	miR-599	352	0.782078
TCATAGC	#N/A	353	0.827628
CTTACGA	#N/A	354	0.868154
TGTGGAT	#N/A	355	0.903683
GCAAGCT	#N/A	356	0.925814
TCCATGA	#N/A	357	0.952542
TGGGAAA	#N/A	358	0.989884
CAAGAGT	#N/A	359	1.00997
CCGTAAC	#N/A	360	1.01678
CAATCTC	miR-5186	361	1.09032
ACACTGC	miR-6499-3p	362	1.16832
AACTCAG	miR-4682	363	1.20595
CCTATGT	#N/A	364	1.2318
CACAACT	#N/A	365	1.33439
ACTAAGG	#N/A	366	1.40371
AGGTCAA	#N/A	367	1.43653
GTGGATC	#N/A	368	1.47511
ATGCAGA	#N/A	369	1.48596
CAAGTCT	#N/A	370	1.48598
CTACCAC	miR-4536-5p	371	1.50641
TGAGCAT	#N/A	372	1.55138
ACCAACA	#N/A	373	1.58177
AGGTCAT	#N/A	374	1.59636
CTAGAAG	#N/A	375	1.60397
ACAAAGG	#N/A	376	1.63353
ACGTTTG	#N/A	377	1.63547
CAAACTC	#N/A	378	1.63911
CACAAGT	#N/A	379	1.65341
GTATGGC	#N/A	380	1.69551
AGATGCT	#N/A	381	1.71421
CCATTCT	#N/A	382	1.76319
CAGGAAA	#N/A	383	1.77137
AGTCAAG	#N/A	384	1.77667
GACAAGT	#N/A	385	1.85462
GGACAAA	#N/A	386	1.90303
CTCACAA	#N/A	387	1.90981
TAGTCCC	#N/A	388	1.92237
CCTTGAT	#N/A	389	1.95423
TCACAAG	#N/A	390	1.95838
AGGATCA	#N/A	391	1.99276
TCCTAGA	#N/A	392	1.99555
ATTGTCC	#N/A	393	2.06411
AGCATGA	#N/A	394	2.10609
AGAGTGA	miR-6794-3p	395	2.15969
GTGAATG	#N/A	396	2.17097
GCCACTA	#N/A	397	2.21494
TTGGTGG	#N/A	398	2.23219
AGTCCTT	#N/A	399	2.26288
TTCCTAG	#N/A	400	2.28535
ATTGGGG	#N/A	401	2.29657
AGATACC	#N/A	402	2.36286
ACAAGTC	#N/A	403	2.40968
CATGAAG	#N/A	404	2.45042
GCAATCA	#N/A	405	2.48057
CCTTACA	#N/A	406	2.56454
ATCTCAA	#N/A	407	2.61286
ATGGGAA	#N/A	408	2.63165
TGCAATG	#N/A	409	2.73861
ACACAAC	#N/A	410	2.78917
GTATGAC	#N/A	411	2.80816
CACTAAG	#N/A	412	2.81289
GTCCATA	#N/A	413	2.81539
CTGATGA	#N/A	414	2.87549
TATCCAC	miR-376c-5p	415	2.91823
ACAGCAA	#N/A	416	2.98662
ACCACTG	#N/A	417	2.99676
GGAAAGA	#N/A	418	3.07201
TGCAGAT	#N/A	419	3.14364
GTACAGC	miR-4718	420	3.17842
GCTACCA	#N/A	421	3.20172
TAAGGGT	#N/A	422	3.21573
TATCTAC	miR-3935	423	3.22536
GGAGTTG	#N/A	424	3.23236
AACTCAA	#N/A	425	3.23872
ACAAGTG	miR-6500-3p	426	3.24208
CAAACCA	#N/A	427	3.27279
AGTGACA	#N/A	428	3.28184
GACTTTC	#N/A	429	3.30546
CAAAGAC	#N/A	430	3.34024
GATAATC	#N/A	431	3.39268
GTTGGAT	#N/A	432	3.41024
GGGTAGT	#N/A	433	3.41194
AAGTGAG	#N/A	434	3.41308
CAGGTAG	#N/A	435	3.46788
GGATTGA	#N/A	436	3.47201
TTGTCCA	#N/A	437	3.55941
AGGAAAG	miR-3124-3p	438	3.61889
GTTTGGC	#N/A	439	3.64347
TGGTCTA	#N/A	440	3.67768
TGAAGTC	#N/A	441	3.70122
AGAAGTG	#N/A	442	3.71436
AAGTGCC	#N/A	443	3.72781
TCCATAC	#N/A	444	3.74224
ACAGGGT	miR-10a-5p	445	3.77239
TAGACCT	#N/A	446	3.84274
GTAGTGC	#N/A	447	3.85604
AGACTGT	#N/A	448	3.87527
CCATATG	#N/A	449	3.8757
GTGCTAC	#N/A	450	3.87818
ACCATAC	#N/A	451	3.88429
CCACTAA	#N/A	452	3.89842
GCAATGC	#N/A	453	3.94513
GAAACTC	#N/A	454	3.96411
GGTCATA	#N/A	455	3.98949
TACTTCC	#N/A	456	4.03805
TCAGTCA	miR-3136-5p	457	4.05728
CAACATG	#N/A	458	4.09448
CTCAGAT	miR-3200-5p	459	4.09991
GACTATC	#N/A	460	4.15985
ACAGCAT	#N/A	461	4.19117
AATAAAT	#N/A	462	4.20856
ATCTACA	#N/A	463	4.22341
ATTGTCG	#N/A	464	4.23748
TGGAACA	#N/A	465	4.24163
CTATCAG	#N/A	466	4.28194
CACGTTT	#N/A	467	4.29073
GAAGTGA	#N/A	468	4.30453
CATTTCC	miR-5093	469	4.3815
GGAAATC	#N/A	470	4.43494
TGCAAAC	#N/A	471	4.45596
ACCTATG	#N/A	472	4.53844
ATCATAG	#N/A	473	4.59818
TAGAAGG	#N/A	474	4.61103
GTCATAG	#N/A	475	4.63639
CCATACT	#N/A	476	4.65826
TGAATGC	#N/A	477	4.72896
GTCTTTG	#N/A	478	4.77049
TGCTTTC	#N/A	479	4.7753
GGTAGTG	miR-4999-3p	480	4.77563
GATTGTC	#N/A	481	4.83185
GTTCAAC	#N/A	482	4.89883
CTATCCA	#N/A	483	4.89995
TGCACTG	miR-148a-3p	484	4.93732
GATTGCA	#N/A	485	4.9403
GAAGTCT	#N/A	486	4.98576
GACTTTG	#N/A	487	5.02988
GTACCAC	#N/A	488	5.03746
AGATTGC	#N/A	489	5.0945
AAGAGTG	#N/A	490	5.18433
CCATGAA	#N/A	491	5.26515
TTTGGCC	miR-3926	492	5.33064
TGTATGA	miR-485-3p	493	5.34905
CACCATA	#N/A	494	5.37914
CTTATGA	#N/A	495	5.46018
AAATCCA	#N/A	496	5.46844
TTAGTCC	#N/A	497	5.48623
GCAATGT	#N/A	498	5.51823
ACAAAGA	miR-6844	499	5.52475
TACAGGG	#N/A	500	5.56903
AGCAATC	#N/A	501	5.58078
GGATCAA	#N/A	502	5.61801
AGTGTGA	#N/A	503	5.75506
AATAGAC	#N/A	504	5.75604
CCAGTCA	#N/A	505	5.78059
TTCAGAC	#N/A	506	5.83158
ACTCAGT	#N/A	507	5.84843
TGTGAAG	#N/A	508	5.8668
ATGAATG	#N/A	509	5.89583
AAAGAGG	#N/A	510	5.91172
CCAGGTA	#N/A	511	5.92569
CAATGCA	miR-33a-5p	512	5.92947
ACTGCAG	miR-17-3p	513	6.06307
TCCTTGA	miR-561-5p	514	6.1688
CAAAGAT	#N/A	515	6.19061
ATCAAAG	#N/A	516	6.20982
ATCCTGT	#N/A	517	6.22187
GAAATCC	miR-876-5p	518	6.22766
TCCTGTT	#N/A	519	6.26786
TACAGCA	#N/A	520	6.33165
CTCAAAG	#N/A	521	6.38848
CCTAGAA	#N/A	522	6.40338
AATTCTC	#N/A	523	6.43453
GCTTATG	#N/A	524	6.51012
TTCAACA	miR-653-5p	525	6.51637
ACCTCAG	miR-7162-3p	526	6.53696
GCATGAA	#N/A	527	6.56294
AAGACTG	#N/A	528	6.57014
TTGTGAC	#N/A	529	6.58083
GACCTAT	#N/A	530	6.62956
ATTCCAG	miR-6128	531	6.65464
AACCAAC	#N/A	532	6.8368
CTCAGTA	#N/A	533	6.84415
TGCCACT	#N/A	534	6.84718
TTCTTGG	#N/A	535	6.87432
AAGGGTA	#N/A	536	6.90924
TATGACT	#N/A	537	6.9114
GGTAGAA	#N/A	538	6.96677
ATCCAGT	miR-1243	539	7.09921
TAGCAGC	#N/A	540	7.13862
AGTCATG	#N/A	541	7.15299
AACATGG	miR-4716-5p	542	7.15805
AGAGAAT	#N/A	543	7.30424
TATGAAT	#N/A	544	7.34229
TGCTGAT	miR-3617-3p	545	7.3862
CTATGTG	#N/A	546	7.42848
GGTCAAA	#N/A	547	7.4663
CTTATGC	#N/A	548	7.47157
ACTTTCT	#N/A	549	7.51946
AAGAATC	#N/A	550	7.58089
GTTGGTG	#N/A	551	7.68174
CTGGAAA	#N/A	552	7.69211
ACTATCC	#N/A	553	7.75138
TCTTGGT	#N/A	554	7.82405
AGGGTTA	#N/A	555	7.85302
CTACAAT	#N/A	556	7.88895
ACAGCTA	#N/A	557	7.91082
GGAAAAG	#N/A	558	7.94189
GTGAAGA	#N/A	559	8.06389
GCACTGA	#N/A	560	8.17601
GCTACAA	#N/A	561	8.20035
ATCAAAC	#N/A	562	8.21181
GTGACTA	#N/A	563	8.24255
GAAACAG	#N/A	564	8.2533
TAGCAAG	#N/A	565	8.39435
CCAACAT	miR-4781-3p	566	8.3959
GTTGTGA	#N/A	567	8.49923
TGAATGG	#N/A	568	8.58307
TGTTCAA	#N/A	569	8.59905
CAACATA	#N/A	570	8.60613
GTCAAGT	#N/A	571	8.63238
TCAAAGA	#N/A	572	8.71555
AATTCAT	#N/A	573	8.7364
TATGCCC	miR-3945	574	8.74108
AGTGCTG	miR-383-3p	575	8.74139
GCCTTAC	#N/A	576	8.7693
ATGACTT	#N/A	577	8.80706
GTTAGTA	#N/A	578	8.86482
GATACCA	#N/A	579	8.88756
TTGGTCT	#N/A	580	8.94273
CTTTGGA	#N/A	581	9.0164
TTCTCAT	#N/A	582	9.2652
TGCTACA	#N/A	583	9.29625
AATTGTC	#N/A	584	9.39158
TATGCTC	#N/A	585	9.40807
GGGTTAA	#N/A	586	9.46741
ATTCTCA	miR-580-3p	587	9.51765
TTCATGC	#N/A	588	9.53495
ATGGTAG	#N/A	589	9.66628
TCAACAA	#N/A	590	9.67478
ATGCTGA	#N/A	591	9.67795
TTGGCCA	miR-548s	592	9.72879
GTGGATT	#N/A	593	9.7464
TTGAGAT	#N/A	594	9.89679
AAACTCA	#N/A	595	9.92365
CAAAGGT	miR-6782-3p	596	9.93941
TCATTGC	#N/A	597	10.1348
GAACAAA	#N/A	598	10.1386
TCTTCAA	#N/A	599	10.1488
GGAACAA	#N/A	600	10.2124
AGAATCA	#N/A	601	10.3375
CAGTCAA	#N/A	602	10.5042
ACATATC	miR-190a-5p	603	10.5429
AGACAAA	#N/A	604	10.5525
ATTTCCT	#N/A	605	10.5993
GTGTGAA	#N/A	606	10.6292
AAATAAA	#N/A	607	10.7307
TCAGTAC	#N/A	608	10.7362
GTGATTC	#N/A	609	10.7577
GTTGCAA	#N/A	610	10.9121
ATTCATG	#N/A	611	10.9178
GAGAATA	#N/A	612	10.9382
AGTTGGA	#N/A	613	11.0034
CACTGCA	#N/A	614	11.03
GCTTTCA	#N/A	615	11.0588
TACAATC	miR-508-3p	616	11.0782
TCTTATG	#N/A	617	11.0884
GCTGTTG	#N/A	618	11.2249
AATGCAG	miR-20a-3p	619	11.2309
TCATGCT	#N/A	620	11.3974
TACCACA	#N/A	621	11.4547
GAAAGAA	#N/A	622	11.5009
ATAGACT	#N/A	623	11.6173
CAGTCAT	#N/A	624	11.7821
AGTAGAG	#N/A	625	11.8218
ACAATCT	#N/A	626	11.8566
CTACAAA	#N/A	627	11.9534
AGATTGG	#N/A	628	11.9679
TTTCAGC	#N/A	629	12.0343
AAACCAA	#N/A	630	12.0861
GATGAAT	#N/A	631	12.1964
CATATCT	#N/A	632	12.4792
GTATTCC	#N/A	633	12.7231
GTCTTAT	#N/A	634	12.7557
AGTTAGT	miR-4637	635	12.7631
AATCATC	#N/A	636	12.7947
GGGAAAT	#N/A	637	12.8497
GTAACCA	#N/A	638	12.8955
ACAAATG	#N/A	639	12.9117
ACTCAAA	#N/A	640	12.9579
CTTGGTT	#N/A	641	13.0034
TCTTTGA	#N/A	642	13.0554
GAAAAGA	#N/A	643	13.0574
ACTTTGG	#N/A	644	13.1204
TCAAGTG	#N/A	645	13.24
GTTGTGT	#N/A	646	13.3058
AAGTGCT	#N/A	647	13.3932
TTCAGCA	#N/A	648	13.4098
AAACAGA	#N/A	649	13.4718
TATTAGC	#N/A	650	13.4776
GTGTATT	#N/A	651	13.5257
TGGTAGA	#N/A	652	13.7005
TGACTAT	#N/A	653	13.7389
TCAAACT	#N/A	654	13.8011
CATTGCA	miR-106a-3p	655	13.8349
GGTACTA	#N/A	656	13.8858
GATCAAA	#N/A	657	13.9096
TTTGTTC	#N/A	658	14.041
CATAGCA	#N/A	659	14.0995
AAGTGAT	#N/A	660	14.1382
TTGCAGA	#N/A	661	14.2982
AAAGTCT	#N/A	662	14.3605
TTAGTCT	#N/A	663	14.3727
AAGTCTT	miR-8087	664	14.4883
GTAGCAA	#N/A	665	14.5969
TGACAGT	#N/A	666	14.7146
CTGAAAC	#N/A	667	14.7429
GGTAGTT	#N/A	668	14.9478
TTTGGGT	#N/A	669	14.9513
GAGCATA	#N/A	670	14.9554
AGCCTTA	#N/A	671	15.008
GTCATGT	#N/A	672	15.1059
ATTCTTC	#N/A	673	15.1299
CAGATTG	#N/A	674	15.1842
GAATGGT	#N/A	675	15.191
AGACTTT	#N/A	676	15.265
CTTCTTA	miR-3653-3p	677	15.2668
TGGATTG	#N/A	678	15.3425
AAAAGTC	#N/A	679	15.4667
TTTCTTG	#N/A	680	15.523
GCAGTTG	#N/A	681	15.5575
ATGAAGT	#N/A	682	15.5758
TGTAGTG	#N/A	683	15.8309
GTTAAAG	miR-302b-5p	684	15.8972
GTACTAC	#N/A	685	15.9316
TGTGAAT	#N/A	686	15.9343
GTCAAAT	#N/A	687	15.9665
GTATCAA	#N/A	688	16.0127
GTTGTTT	#N/A	689	16.0806
TCAAAGT	#N/A	690	16.0938
CAATCAA	#N/A	691	16.1773
GACAAAT	#N/A	692	16.1778
TATGTGA	#N/A	693	16.2549
AGTTGTG	#N/A	694	16.3558
CATATGT	miR-5580-3p	695	16.7003
AAGAAAC	#N/A	696	16.7952
AATCATA	#N/A	697	16.8437
GTACTGA	#N/A	698	16.8706
GAAGAAT	#N/A	699	16.8898
GAATGCT	miR-1179	700	17.0091
AGTAATA	#N/A	701	17.1429
TTGTTCA	#N/A	702	17.3392
AACAGAA	miR-4652-3p	703	17.4382
GAAATTC	#N/A	704	17.4498
ATAATCA	#N/A	705	17.5774
TTCTTCA	#N/A	706	17.5885
TGCCTTT	miR-548an	707	17.8748
GACTGTT	miR-212-3p	708	17.9341
GAGCTTA	#N/A	709	18.1957
AAAGACT	#N/A	710	18.2131
TTGGATA	#N/A	711	18.2275
ACTTTGT	#N/A	712	18.2488
GAATCAT	#N/A	713	18.3349
AATCAAA	#N/A	714	18.5035
CTGTTTG	#N/A	715	18.7453
TAGAAAC	#N/A	716	18.8753
GGATAAT	#N/A	717	18.9088
AGTCTTG	#N/A	718	19.0121
CAAATAG	#N/A	719	19.0805
TAGTGTG	#N/A	720	19.1711
CATTCTT	#N/A	721	19.1957
AGTGCTT	#N/A	722	19.2133
TAACCAT	#N/A	723	19.3401
TTGTAGC	miR-187-5p	724	19.4655
ACAGAAT	miR-4778-5p	725	19.6207
TAGACTT	#N/A	726	19.6651
GCAGATT	#N/A	727	19.6868
TAGCAAT	#N/A	728	19.7383
AGGTAGT	#N/A	729	19.7721
CAGTTAG	#N/A	730	19.7971
ATGTTGG	#N/A	731	19.855
TTATCAA	#N/A	732	19.9302
TACTTAC	#N/A	733	20.1202
TAGTGCT	#N/A	734	20.1412
TTGAAGC	#N/A	735	20.153
GTAATAG	#N/A	736	20.2064
CTGTTGT	#N/A	737	20.3435
AACAAGT	#N/A	738	20.4223
ATTAGCA	#N/A	739	20.4399
TGTGTAT	#N/A	740	20.4553
TTAGTAC	#N/A	741	20.5643
TGTTGGT	#N/A	742	20.5819
GACAGTT	#N/A	743	20.913
TTGTACC	#N/A	744	20.9611
TGTACCA	miR-150-3p	745	21.1262
CCTTTTG	#N/A	746	21.2582
ATACTTC	#N/A	747	21.4278
GGAAATT	#N/A	748	21.4452
ACTATCA	#N/A	749	21.5594
TTAGCAA	#N/A	750	21.614
TGTATTC	#N/A	751	21.6786
TGGAAAT	#N/A	752	21.7227
CTTACAG	#N/A	753	21.7675
GATTGAA	#N/A	754	21.8394
GTAGAAA	#N/A	755	21.8662
AAGATAC	#N/A	756	21.8753
TGACTTT	#N/A	757	22.0412
ATTTAGT	#N/A	758	22.1534
TTACAGG	#N/A	759	22.1755
TACCACT	#N/A	760	22.1875
AACTATC	#N/A	761	22.3467
AGTCTTT	miR-548u	762	22.3981
TACAAAG	#N/A	763	22.4175
TTTCTGA	#N/A	764	22.7309
ATTGTAG	#N/A	765	22.8049
AATGGTA	#N/A	766	22.8081
TACTACA	#N/A	767	22.8116
GGTTAAA	miR-552-5p	768	22.836
GATTTTC	#N/A	769	22.982
ATAGAAG	#N/A	770	23.2748
CCATTTA	#N/A	771	23.4277
ATATTAT	miR-5692c	772	23.4281
TATTCCA	miR-6505-5p	773	23.575
TGAATTG	#N/A	774	23.799
TTTAGTC	#N/A	775	23.8681
GCTTTTC	#N/A	776	23.99
TTTCCTA	#N/A	777	24.019
AGTACAG	#N/A	778	24.0716
TTTAATA	#N/A	779	24.2006
GTTTATC	#N/A	780	24.2387
TTATGAA	#N/A	781	24.3983
ATGAATA	#N/A	782	24.429
ACTACAG	miR-20b-3p	783	24.4737
TGGATAA	#N/A	784	24.484
TTGTATG	#N/A	785	24.4901
TATCAAA	#N/A	786	24.5025
CATATTA	#N/A	787	24.5407
CACTAAA	#N/A	788	25.0865
ATTGCAG	#N/A	789	25.2032
TGTTGCA	#N/A	790	25.2613
TATCAGT	#N/A	791	25.4083
TTTGAGA	#N/A	792	25.5102
GTAGTGT	#N/A	793	25.5162
AACAAAA	#N/A	794	25.7188
CACTGAA	#N/A	795	25.7334
CTTGATT	#N/A	796	25.8251
AGCTTAT	#N/A	797	25.9098
ACTAAAA	#N/A	798	25.9425
CATACTT	#N/A	799	25.9784
CAAATGA	miR-579-3p	800	26.0388
ACAACTT	miR-382-5p	801	26.0592
TGTTGTT	#N/A	802	26.2116
TGAAGAA	#N/A	803	26.2906
CAATGTT	#N/A	804	26.3036
CTTTCAG	miR-4766-5p	805	26.3145
TCAAAAC	miR-2052	806	26.5824
TTGTGTA	#N/A	807	26.6059
ACCATAT	#N/A	808	27.0776
TTCTTAT	#N/A	809	27.184
TAGTACA	#N/A	810	27.4715
ATGAATT	miR-4760-3p	811	27.5502
AGAAACT	#N/A	812	27.5538
GCATATT	#N/A	813	27.5736
AGTGATT	miR-34b-3p	814	27.6043
ACCATTT	miR-224-3p	815	27.6231
ATATCTA	#N/A	816	27.6645
TAATCAT	#N/A	817	27.77
TAATAGA	#N/A	818	27.8613
TTTGTAC	#N/A	819	27.8748
GTGCTTT	miR-6835-3p	820	27.921
AGATTGT	#N/A	821	27.9345
AAGTAGA	#N/A	822	27.9913
TTATGCC	#N/A	823	27.9939
TAGTCTT	#N/A	824	28.2388
AACCATA	miR-584-5p	825	28.2439
TAGAAGT	#N/A	826	28.7078
AAAGTGA	#N/A	827	28.8507
CTTGTAT	miR-381-3p	828	28.9308
TTATGCT	#N/A	829	28.994
ATTGAAG	#N/A	830	29.003
ATGTGAA	#N/A	831	29.1017
TGTTTGT	#N/A	832	29.2113
AAACAAA	#N/A	833	29.6225
CAGAATT	#N/A	834	29.6385
GTAGTTA	#N/A	835	29.6847
CTAAAAG	#N/A	836	29.8096
ACAAAAT	#N/A	837	29.8288
ATGTATC	#N/A	838	29.8394
TAGTTAA	#N/A	839	29.9018
TGATGAA	#N/A	840	29.9207
AAAACAC	#N/A	841	30.0479
TTAATAG	#N/A	842	30.1577
CAGTACT	miR-1278	843	30.3736
AGTACTG	#N/A	844	30.5603
CAGTTGT	#N/A	845	30.5755
GCCTTTT	#N/A	846	30.6011
TGTATCA	#N/A	847	30.9131
ACAGTTG	#N/A	848	30.9386
TCAGTTA	#N/A	849	30.9558
GAATTGT	#N/A	850	31.0304
AAAAGAG	#N/A	851	31.0677
TGTAGCA	#N/A	852	31.0683
ACAAAAC	#N/A	853	31.3236
AATGCTG	miR-4310	854	31.3294
CTTTTCA	#N/A	855	31.3527
GCATTTC	#N/A	856	31.4389
TATAACT	#N/A	857	31.4403
AAATAGA	#N/A	858	31.4493
AATATTA	#N/A	859	31.5722
AAAACAG	#N/A	860	31.7088
AGAATTG	#N/A	861	31.8723
GTTTGTT	miR-495-3p	862	32.108
TCATGTA	#N/A	863	32.2446
ATATTAG	#N/A	864	32.3022
AAACACT	#N/A	865	32.3957
ATAGCAG	#N/A	866	32.3972
GTTTAGT	#N/A	867	32.6177
CATGAAA	#N/A	868	32.6248
TAATTCA	miR-183-3p	869	32.672
GTTTAAT	#N/A	870	32.6735
AATGTTG	#N/A	871	32.7004
AAGCAGT	#N/A	872	32.7328
TTAATTC	#N/A	873	32.7476
TGAAACA	#N/A	874	33.1158
AACACTG	#N/A	875	33.1997
CAACTTT	#N/A	876	33.5037
TTTAATT	#N/A	877	33.549
CAAAACT	#N/A	878	33.5686
ATCAAAA	#N/A	879	33.5763
TATGTTG	#N/A	880	33.7124
AACAGAT	#N/A	881	33.7948
ATATGTT	#N/A	882	34.3864
AAGTAAT	#N/A	883	34.4838
AAAGATA	#N/A	884	34.6604
TTTGTAG	miR-1283	885	34.7539
ACTTGTA	#N/A	886	34.7642
ATATAAC	#N/A	887	34.899
CATGTAT	#N/A	888	34.9927
AAAAGTG	#N/A	889	35.0394
TCAAATA	#N/A	890	35.0688
ATACTTG	#N/A	891	35.0975
TATTATG	#N/A	892	35.1459
TTGATTT	miR-551b-5p	893	35.1957
TTTGGAA	#N/A	894	35.2845
ACTTTTC	#N/A	895	35.3848
AAAAATA	#N/A	896	35.4237
CAAAACA	#N/A	897	35.8169
AGTCTTA	miR-499a-5p	898	35.8236
TATGTTT	#N/A	899	36.1161
GTTAAAT	#N/A	900	36.1344
TGTTTAG	#N/A	901	36.2335
ATAAATT	#N/A	902	36.2873
TTGGAAA	#N/A	903	36.3217
TGCTGTT	#N/A	904	36.6953
TTGCAAA	miR-450b-5p	905	36.784
TGTTTAT	#N/A	906	36.8579
CTTTTGT	#N/A	907	36.859
GAAACAA	#N/A	908	36.9889
ATGTTGC	#N/A	909	37.1881
TTGTAGT	#N/A	910	37.4982
TTCATTG	#N/A	911	38.033
ATTGCAT	#N/A	912	38.2957
AGAATAT	#N/A	913	38.6649
AGCATAT	#N/A	914	38.7181
GAAAAGT	miR-5003-3p	915	38.8571
CAAAGTA	#N/A	916	38.956
TTTATCA	#N/A	917	39.0307
GAAACTA	#N/A	918	39.1433
ATTTAAT	#N/A	919	39.7791
AACTTTG	#N/A	920	40.0376
GAATATA	#N/A	921	40.2628
TTTTGTA	#N/A	922	40.6144
TCAAAAT	#N/A	923	40.6512
TTAAAGT	#N/A	924	40.7129
CTTTGTA	miR-524-5p	925	40.8022
TGGAAAA	#N/A	926	40.8092
CTTGTTT	#N/A	927	41.111
AATTGAA	#N/A	928	41.4419
AAAATAC	#N/A	929	41.8943
GAAACTT	#N/A	930	41.9523
GAAAAAC	#N/A	931	41.9915
AACATAT	#N/A	932	42.0252
AATAGAA	miR-4482-3p	933	42.1018
AAATTCT	#N/A	934	42.2712
ACAGATT	#N/A	935	42.2877
ATGAAAT	#N/A	936	42.5787
AAAGAAA	#N/A	937	42.6498
TACTTGT	#N/A	938	42.6613
TACCATT	#N/A	939	42.938
CAAAATA	#N/A	940	43.586
ATAACTT	#N/A	941	43.7116
TGAAAAG	#N/A	942	44.4627
TTCTGAA	#N/A	943	44.491
TTATGTT	miR-4803	944	44.6047
AAACTAT	#N/A	945	44.67
TAAATGC	#N/A	946	45.0993
ATCAGTT	#N/A	947	45.7011
AAAAACA	#N/A	948	45.764
TTGGTTT	#N/A	949	45.8371
AATTTAG	#N/A	950	45.8671
GGTTTAA	#N/A	951	45.8817
TCAGATT	#N/A	952	46.0621
AAAATAA	#N/A	953	46.2028
TTGTTTA	#N/A	954	46.2132
AAAGTAG	#N/A	955	46.3324
TGATTTT	#N/A	956	47.1557
GAATATT	#N/A	957	47.2076
ATTATGT	#N/A	958	47.3506
TTTTCAT	#N/A	959	47.7708
ATACCAT	#N/A	960	48.0572
TCTGAAA	#N/A	961	48.1985
GTTTTGA	#N/A	962	48.6356
ATTGTAC	#N/A	963	49.0341
GAAGAAA	#N/A	964	49.4268
TAAAGTA	#N/A	965	50.0017
AACTTGT	#N/A	966	50.279
GAAATTG	#N/A	967	50.3527
AGCAGTT	#N/A	968	50.392
AATATAA	#N/A	969	50.6176
TTTCATT	#N/A	970	51.1502
ATACTTA	#N/A	971	51.6566
CAAAATT	#N/A	972	51.8465
TGGTTTA	#N/A	973	53.3284
TTTGAAG	#N/A	974	53.8038
AAAATGC	#N/A	975	53.9991
AATGAAA	#N/A	976	54.274
TTGAAGA	#N/A	977	54.4563
ATGTTTA	#N/A	978	54.7312
AAATTGA	#N/A	979	54.7929
ATTGAAA	#N/A	980	54.8324
AACTTTT	#N/A	981	55.1929
TTTTCAG	#N/A	982	55.3784
ACTTGTT	#N/A	983	55.5594
AAACTTT	miR-561-3p	984	55.7954
AAAAATT	#N/A	985	55.9335
AATGCTT	#N/A	986	55.9745
AAATGAA	#N/A	987	55.9829
TTTCAGA	#N/A	988	56.3297
AAATTTA	#N/A	989	56.9629
TTGCATT	#N/A	990	57.3292
TGCATTT	#N/A	991	57.5677
ATTTTGA	#N/A	992	57.8723
TGAATAT	miR-6074	993	58.4351
GAAAAAA	#N/A	994	58.5043
AATACTT	#N/A	995	58.9336
ATTTTCT	#N/A	996	59.3347
AAAAAAT	#N/A	997	59.5829
AAATGCT	#N/A	998	59.5912
GAAAATG	miR-1250-3p	999	60.2989
TAACTTT	miR-548at-5p	1000	60.3988
TAAAAGT	#N/A	1001	61.2363
TTAAATG	#N/A	1002	61.6297
ACTGTTT	#N/A	1003	61.7562
TGAAATT	#N/A	1004	62.603
AGTTAAA	#N/A	1005	63.9351
AAACTTG	#N/A	1006	63.9527
TACTGAA	#N/A	1007	64.2786
TTGAAAA	#N/A	1008	66.4371
TGAAAAT	#N/A	1009	67.2214
ACTGAAA	miR-30a-3p	1010	69.3369
AATTTTG	#N/A	1011	71.8891
ATGAAAA	miR-335-3p	1012	72.0577
GAAAAAT	#N/A	1013	72.6466
AAAGTAA	#N/A	1014	74.3227
TTTTCTT	#N/A	1015	75.4582
ATGCTTT	miR-4422	1016	78.3235
TAAATTT	#N/A	1017	78.3977
AATTGTA	#N/A	1018	78.9278
CATTTAA	#N/A	1019	81.7637
TGTTTTG	#N/A	1020	81.7852
AAATTGT	#N/A	1021	82.391
AAATACT	#N/A	1022	82.9257
TGCTTTT	miR-548e-5p	1023	83.5747
TTTTGAA	#N/A	1024	84.169
CTGAAAA	#N/A	1025	85.1933
AAAACTT	#N/A	1026	86.2112
TGAAAAA	#N/A	1027	87.6393
TTTGAAA	#N/A	1028	97.9158
AAAATTG	#N/A	1029	109.854
TTGTTTT	#N/A	1030	112.785
AAATTTT	miR-4282	1031	114.089
AAAATTT	#N/A	1032	123.933

## Sheet: J82_48h
7mer	miRNA	Rank	Motif score
GCAGCCT	#N/A	1	-32.1924
GGCAGCC	#N/A	2	-29.0477
ATGGCCT	miR-15a-3p	3	-28.1294
CCCTGCC	miR-1207-5p	4	-27.7687
GCCAGAG	#N/A	5	-25.5879
CCCCAGC	miR-4731-5p	6	-22.6756
GCAGCTC	miR-558	7	-22.3805
CAAGCAG	#N/A	8	-22.2388
CGGCAGC	#N/A	9	-21.8993
GGCCCCC	#N/A	10	-21.8225
CAGCCTT	#N/A	11	-21.4746
TGGCCTC	#N/A	12	-21.16
CTGCACT	#N/A	13	-19.3781
CTGGAGA	#N/A	14	-19.2719
GCCCCCA	#N/A	15	-18.5701
CCCCCAG	miR-637	16	-18.4848
TATGGCC	#N/A	17	-17.5084
AGGCCCC	#N/A	18	-16.859
GTGGCCA	miR-588	19	-16.2188
AGCAGCT	#N/A	20	-15.6196
GTGCTGT	#N/A	21	-15.4755
GGCCAGT	miR-193a-3p	22	-15.4345
GGCACAG	miR-6889-3p	23	-15.4077
TCCTGTT	#N/A	24	-15.2123
CCCCTGC	miR-1909-3p	25	-15.0348
AGTGCCT	#N/A	26	-14.9885
GGCCTCA	#N/A	27	-14.7966
GGCCAGG	#N/A	28	-14.5086
CTTTGGG	miR-186-3p	29	-14.2774
TGGCCAG	miR-3190-5p	30	-14.1607
TGGGGCG	#N/A	31	-14.0819
TCCTCCC	miR-7106-5p	32	-14.0618
TTTGGCC	miR-3926	33	-13.9079
CTTCCTG	#N/A	34	-13.8851
TGGCCAC	#N/A	35	-13.5563
TTGGCCA	miR-548s	36	-12.4982
GGCTCAG	miR-1199-5p	37	-12.4494
GTGCAGG	#N/A	38	-12.4066
AGTGGCC	#N/A	39	-11.6085
GATGCTG	#N/A	40	-11.5946
CCTCCCA	miR-30b-3p	41	-11.5648
GCCAGGT	#N/A	42	-11.4737
GCAGGTG	#N/A	43	-11.3766
GTCCTTG	#N/A	44	-11.1246
CCTGCCA	miR-7150	45	-11.0811
TGCAGGC	#N/A	46	-11.004
AGTGCTG	miR-383-3p	47	-10.6604
CTGTTGT	#N/A	48	-10.2937
GACAGCT	#N/A	49	-10.1117
GGGCGTG	#N/A	50	-10.0125
GCTGTTG	#N/A	51	-9.78132
AGCTCAG	#N/A	52	-9.66326
TCCAGTG	#N/A	53	-9.43115
CTGCAGG	#N/A	54	-9.36008
TCCCCTG	#N/A	55	-9.29375
GGCCACT	miR-3677-5p	56	-9.28329
TGCACTG	miR-148a-3p	57	-9.17927
TGCCCGT	#N/A	58	-9.11206
GGGGCGT	#N/A	59	-8.77145
CGGCCAG	#N/A	60	-8.7169
AGCCAAG	#N/A	61	-8.65517
CCACTGC	#N/A	62	-8.63868
AGTGAGC	#N/A	63	-8.56858
GCCACTG	miR-5693	64	-8.47173
AGAGCCA	miR-8057	65	-8.46491
AGGTGCT	#N/A	66	-8.4465
AGCAGCG	#N/A	67	-8.3081
TTCCTGC	#N/A	68	-8.26999
GTGAAGA	#N/A	69	-8.21763
TCGGCCC	miR-6877-5p	70	-8.21383
CAGCAAG	#N/A	71	-8.13462
CCACAGG	#N/A	72	-8.00634
CTCGAGG	#N/A	73	-7.88993
CAGGTGC	miR-6804-3p	74	-7.88972
GAAGGCC	#N/A	75	-7.81267
TGGTGGA	#N/A	76	-7.54245
GATCCTG	#N/A	77	-7.51585
CTCAGGC	#N/A	78	-7.43785
TGGAACA	#N/A	79	-7.42026
CTGCCAC	#N/A	80	-7.4184
ACCACTG	#N/A	81	-7.39607
TGAGGAG	#N/A	82	-7.34591
CCTGTTC	#N/A	83	-7.22672
TCGAGGC	#N/A	84	-7.1956
CAGTTAG	#N/A	85	-7.18866
GCAAGGC	#N/A	86	-7.16375
ACTTTGG	#N/A	87	-7.04254
CCCACCA	#N/A	88	-7.01747
GCCTCAC	miR-4316	89	-6.93428
CAGCACC	#N/A	90	-6.87695
GTGAGCA	miR-1178-3p	91	-6.70391
AGCCAGA	#N/A	92	-6.6971
GCTCACG	#N/A	93	-6.66138
GCTGATG	#N/A	94	-6.49638
CAGCGCA	#N/A	95	-6.3562
AGTAGAG	#N/A	96	-6.31229
TCAGCAC	#N/A	97	-6.19944
ACCTCAG	miR-7162-3p	98	-6.19303
TCCTGCA	#N/A	99	-6.16335
GGGTCGG	#N/A	100	-6.12326
TGAAGAA	#N/A	101	-6.09312
TCACGTG	#N/A	102	-6.07924
CAGCTAC	#N/A	103	-6.0721
GAGGGAC	#N/A	104	-6.06545
GTTGTGT	#N/A	105	-6.04674
CCTCGAG	#N/A	106	-6.02427
AGGCACC	#N/A	107	-6.02152
CAAGGCT	#N/A	108	-5.90864
AGAAGGT	#N/A	109	-5.85258
GCAGGCA	miR-6894-3p	110	-5.71976
CAGGATC	#N/A	111	-5.69173
GGCGTGG	#N/A	112	-5.69134
TCAAGCC	#N/A	113	-5.65318
CCAGTGA	miR-653-3p	114	-5.64088
CTCAAGC	#N/A	115	-5.52483
TGTTGCA	#N/A	116	-5.44625
GCACAGC	#N/A	117	-5.3793
TAGAGCC	miR-6822-3p	118	-5.37199
GGTGGAT	#N/A	119	-5.36211
GCGTGGC	#N/A	120	-5.3476
AGAAGGC	#N/A	121	-5.33046
GTCCCCT	#N/A	122	-5.18941
GAGAAGG	#N/A	123	-5.16294
CACGTGC	#N/A	124	-5.09656
CGTTTGG	#N/A	125	-5.06206
GCCAGTC	#N/A	126	-5.05743
AGCAAGC	#N/A	127	-5.02931
TGTGAAG	#N/A	128	-4.94793
GCCAAGC	#N/A	129	-4.9142
AAGCCAG	#N/A	130	-4.85192
TCGAGGA	#N/A	131	-4.8426
CGAGGAC	#N/A	132	-4.76918
GCTCAGT	#N/A	133	-4.76426
GAGGACA	#N/A	134	-4.72201
ACTGCAG	miR-17-3p	135	-4.71321
GTTGTTT	#N/A	136	-4.7056
CTGGAAC	#N/A	137	-4.67805
GGCACCT	#N/A	138	-4.6539
GAAGGTG	#N/A	139	-4.61303
CGGCCCA	#N/A	140	-4.59529
TGCAGAC	#N/A	141	-4.55811
TGACAGC	#N/A	142	-4.48794
CGAGGCA	#N/A	143	-4.46877
CCACTGG	#N/A	144	-4.42917
GCAGCGC	#N/A	145	-4.38409
CAGAGAA	#N/A	146	-4.36655
TTCCAGG	#N/A	147	-4.26256
CCCAGCG	#N/A	148	-4.24406
GCTCAGG	#N/A	149	-4.21887
TCGGCCA	#N/A	150	-4.1752
CAGGCAC	miR-550a-5p	151	-4.15785
TCCAGGA	#N/A	152	-4.14281
AGGGACA	#N/A	153	-4.0861
CTTTCTG	#N/A	154	-4.06919
GAGGAGT	#N/A	155	-4.05716
AAGGCCC	#N/A	156	-4.01852
CGTCAAG	#N/A	157	-4.01284
GCACTGA	#N/A	158	-3.95717
GTGACAG	miR-6773-3p	159	-3.94301
CAAGTGG	#N/A	160	-3.9058
AGCAAGG	#N/A	161	-3.86189
GGCCCAT	#N/A	162	-3.80385
GATGTGG	#N/A	163	-3.79705
GTGAGGA	#N/A	164	-3.77468
CATCCTC	miR-3605-5p	165	-3.75187
TCATCCT	#N/A	166	-3.74721
AGTCCTT	#N/A	167	-3.72023
CAACATG	#N/A	168	-3.67874
CAGCTCA	#N/A	169	-3.67443
TGCAGGT	#N/A	170	-3.59367
AGGAGTT	#N/A	171	-3.52247
TGCTGGA	#N/A	172	-3.52006
ACCCACC	miR-6769a-5p	173	-3.42429
ATTTCCT	#N/A	174	-3.38747
GGAGAAG	#N/A	175	-3.36836
GTTTGGC	#N/A	176	-3.32399
AAGGCTC	#N/A	177	-3.32302
CCAAGCA	#N/A	178	-3.32047
CAAGAGT	#N/A	179	-3.30294
TCAGGCA	#N/A	180	-3.28046
GTATGAC	#N/A	181	-3.2578
GAGGCAC	#N/A	182	-3.22443
CAGATTG	#N/A	183	-3.22321
CGGACCT	#N/A	184	-3.20293
AGCTACC	#N/A	185	-3.19124
CAGTGAC	#N/A	186	-3.17083
AAGGTGA	#N/A	187	-3.1434
TTGGGGC	miR-5699-5p	188	-3.11465
ATTCCAG	miR-6128	189	-3.10233
GAAGTGA	#N/A	190	-3.09083
CCACGGA	#N/A	191	-3.033
CACGTTT	#N/A	192	-2.95325
AGGCACA	miR-550b-2-5p	193	-2.94256
GCACCGT	#N/A	194	-2.93296
AAGTGGC	#N/A	195	-2.88579
TGGAGAA	#N/A	196	-2.8778
CTCAGAT	miR-3200-5p	197	-2.86095
CCAGTCA	#N/A	198	-2.85382
CACAGCA	#N/A	199	-2.85156
ATCTCGG	#N/A	200	-2.83236
ATTCTCA	miR-580-3p	201	-2.82296
CATTTCC	miR-5093	202	-2.80982
GAGTGAG	#N/A	203	-2.79337
GGACACA	#N/A	204	-2.72353
TGAGCAT	#N/A	205	-2.70207
AGCGATG	#N/A	206	-2.69302
CTCCCAC	miR-1233-5p	207	-2.6888
TGTCCAT	#N/A	208	-2.68659
TCGGCAG	#N/A	209	-2.67687
CGTGCAG	#N/A	210	-2.66224
GGGACAA	miR-4646-3p	211	-2.66105
TGCTGAT	miR-3617-3p	212	-2.64508
TACAGGG	#N/A	213	-2.64192
CCCGTCA	#N/A	214	-2.60329
CAGGAAA	#N/A	215	-2.59984
GTCAAGG	#N/A	216	-2.55368
CTTTGAG	#N/A	217	-2.49607
AAAGGTC	miR-6759-3p	218	-2.49562
CCAGCGA	#N/A	219	-2.44325
ACAGGGT	miR-10a-5p	220	-2.43454
CCTCACA	#N/A	221	-2.423
AGGCTCA	#N/A	222	-2.37804
ACCACAG	#N/A	223	-2.37427
AGATGCT	#N/A	224	-2.36894
AGAGGGA	miR-642a-5p	225	-2.343
CTCATCC	miR-1255a	226	-2.30086
GTAGAGC	#N/A	227	-2.2669
TCGGTAC	#N/A	228	-2.23138
GGTCGGC	#N/A	229	-2.22767
CAAGCTC	#N/A	230	-2.22753
GTCGGCC	#N/A	231	-2.21075
TGGGTCG	miR-551a	232	-2.20016
AGTGAGG	#N/A	233	-2.19869
TGCTCCA	#N/A	234	-2.18457
ACATGGG	#N/A	235	-2.12018
CATCCTT	#N/A	236	-2.09966
GATCTCA	#N/A	237	-2.06059
CAGCGAT	#N/A	238	-2.04287
CCACCAT	#N/A	239	-2.01958
GAAGCGC	#N/A	240	-1.98062
ACAAAGG	#N/A	241	-1.92366
GACCTCG	#N/A	242	-1.89103
GTACGAG	#N/A	243	-1.83189
CCTCAGA	#N/A	244	-1.81457
AGTCCCC	miR-4652-5p	245	-1.78156
ATGAATG	#N/A	246	-1.77342
CTCAGTC	miR-6857-3p	247	-1.70127
GGATCCT	miR-4661-3p	248	-1.69156
CCTTCTT	#N/A	249	-1.68309
AGGACAC	#N/A	250	-1.67616
GGTGACT	#N/A	251	-1.62161
GTATGGC	#N/A	252	-1.61789
CGAGCTT	miR-99a-3p	253	-1.61259
ACAGCAT	#N/A	254	-1.55884
TCTCAAG	#N/A	255	-1.55752
CTAAGGG	#N/A	256	-1.54404
AGGCACG	#N/A	257	-1.49826
GCTTTCA	#N/A	258	-1.48572
ACTTACG	#N/A	259	-1.46652
TGTGACA	#N/A	260	-1.46471
CTGATGA	#N/A	261	-1.45195
ACCGTAA	#N/A	262	-1.4497
CAAGTGC	#N/A	263	-1.43734
CCATGAA	#N/A	264	-1.42151
ACAGCAA	#N/A	265	-1.40934
GTACAGC	miR-4718	266	-1.36572
CCGTCAA	#N/A	267	-1.34604
GAGCCAA	#N/A	268	-1.3358
ACGAAGT	#N/A	269	-1.33038
CACTGGA	#N/A	270	-1.3248
GTCTTGG	#N/A	271	-1.30315
ACAGGAT	#N/A	272	-1.28865
AGGATCA	#N/A	273	-1.27825
TTGGGTC	#N/A	274	-1.27418
GATTGTC	#N/A	275	-1.26809
AGGTGAC	#N/A	276	-1.25236
CTACCAC	miR-4536-5p	277	-1.24474
GCAGACA	miR-632	278	-1.21683
GCTGGAA	#N/A	279	-1.21405
GCACCTC	#N/A	280	-1.21273
CAAGCCA	#N/A	281	-1.196
TCAAGGT	#N/A	282	-1.18772
AGACCTC	#N/A	283	-1.17577
AAGTGCC	#N/A	284	-1.17175
CCAGGAA	#N/A	285	-1.16861
CCAGAGA	miR-3191-5p	286	-1.16514
AGCACCG	miR-1250-5p	287	-1.15853
AAGTCCT	miR-8083	288	-1.15598
GCCACTA	#N/A	289	-1.14848
TACAGCA	#N/A	290	-1.11914
TGGATCC	#N/A	291	-1.1123
GCCCGTC	#N/A	292	-1.1034
GGCACGT	#N/A	293	-1.1013
AGAAGTG	#N/A	294	-1.09373
TCCTTCT	#N/A	295	-1.09339
AGTGACA	#N/A	296	-1.08775
ACCTCGA	#N/A	297	-1.05987
CATGGGA	#N/A	298	-1.05334
GGTCAAA	#N/A	299	-1.03696
ACTGGAG	miR-3925-3p	300	-1.02099
CAGCATG	#N/A	301	-1.01413
ATCCTCC	miR-6894-5p	302	-0.946509
CACTAAG	#N/A	303	-0.918692
CAAGGTC	#N/A	304	-0.908564
GACAAAG	#N/A	305	-0.880223
CAAACTC	#N/A	306	-0.870534
TCCACGG	#N/A	307	-0.848903
GAGATGC	#N/A	308	-0.841401
GGATCAA	#N/A	309	-0.841323
ATCATCC	#N/A	310	-0.825493
CACGGAC	#N/A	311	-0.780568
GACTTTC	#N/A	312	-0.742666
TACCCAC	#N/A	313	-0.72981
CCTGCAA	#N/A	314	-0.720916
GTTCGGC	#N/A	315	-0.671279
AAGGTCA	#N/A	316	-0.661424
GCTGATC	#N/A	317	-0.650651
TGTACGA	#N/A	318	-0.640606
GTCGAGG	#N/A	319	-0.628072
CATGCTG	#N/A	320	-0.611593
ACGGACC	#N/A	321	-0.596843
TGTTCGG	#N/A	322	-0.589203
TTCGGCC	#N/A	323	-0.587837
GCGAAAC	#N/A	324	-0.5851
TCGATGA	#N/A	325	-0.584819
GGTCGAG	#N/A	326	-0.584021
AAGCTCA	#N/A	327	-0.582066
GCCCATT	#N/A	328	-0.575621
ATTCGGC	#N/A	329	-0.570988
CTTACGA	#N/A	330	-0.556151
CGGTACT	#N/A	331	-0.550912
GATTGGG	#N/A	332	-0.54837
AAGCGCA	#N/A	333	-0.505979
ATGTGGA	#N/A	334	-0.496625
AGGGTAG	#N/A	335	-0.483211
GCAAGAG	#N/A	336	-0.481511
TGAAGCG	#N/A	337	-0.475696
ATCCACG	#N/A	338	-0.473427
AAGAGGG	#N/A	339	-0.462762
GCGCAAT	#N/A	340	-0.434602
CACAGGA	#N/A	341	-0.425767
CTACCCA	miR-1229-5p	342	-0.42147
CAGACAA	#N/A	343	-0.414298
GCTACCA	#N/A	344	-0.411913
TCCCACT	#N/A	345	-0.374919
AGCTCAC	#N/A	346	-0.364166
ACTAAGG	#N/A	347	-0.356899
CTCACGT	#N/A	348	-0.352884
CTGTTCG	#N/A	349	-0.323603
TTGGTCG	#N/A	350	-0.32113
CTCCATG	#N/A	351	-0.313582
CCGTAAC	#N/A	352	-0.288639
GATTCGG	#N/A	353	-0.249369
GGACAAA	#N/A	354	-0.235684
ACGTTTG	#N/A	355	-0.228444
GCTCCAT	#N/A	356	-0.227845
CGCAATG	#N/A	357	-0.213882
GCAAACC	#N/A	358	-0.197405
CCCATTC	#N/A	359	-0.190436
TCTCGGT	miR-4523	360	-0.188111
GTCCATA	#N/A	361	-0.180239
TATGAAT	#N/A	362	-0.142516
CAAAGAC	#N/A	363	-0.138659
ATCCTTC	#N/A	364	-0.134784
TCTACCC	miR-197-5p	365	-0.134346
ATGCTCC	#N/A	366	-0.132238
CCCACTA	miR-4727-3p	367	-0.115156
TAGACCT	#N/A	368	-0.110968
TGAGATG	#N/A	369	-0.110045
CGATGTG	#N/A	370	-0.104844
TTCGGCA	#N/A	371	-0.103519
GCAAGCT	#N/A	372	-0.102412
ACACAAC	#N/A	373	-0.0967221
CTCGGTA	#N/A	374	-0.0924221
ACGTGCA	#N/A	375	-0.0898924
CCTATGT	#N/A	376	-0.0777605
CAACAAG	#N/A	377	-0.0708291
AATCTCG	#N/A	378	-0.0697209
GCGCAAG	#N/A	379	-0.0600657
TACGAGC	#N/A	380	-0.0555267
ACGAGCT	#N/A	381	-0.0537635
CGTGGCG	#N/A	382	-0.0400355
TTGTCGA	#N/A	383	-0.0383281
TGATTCG	#N/A	384	-0.0381541
GTGGCGA	miR-6788-3p	385	-0.0206518
CGCAAGA	#N/A	386	-0.0031282
CACCGTA	#N/A	387	0.0178986
TCTACAA	miR-3674	388	0.0204046
ATGCTGG	miR-338-3p	389	0.025755
GACACAA	miR-599	390	0.0358492
TATCCAC	miR-376c-5p	391	0.0425243
CGAAACA	#N/A	392	0.056121
TGGCGAA	#N/A	393	0.0806491
ATCAAAG	#N/A	394	0.0839614
AGACAAG	#N/A	395	0.0977891
GCACGTT	#N/A	396	0.0982503
GTCTACC	miR-379-5p	397	0.103633
TTACGAA	#N/A	398	0.123289
TCAACAT	#N/A	399	0.1475
CTATCAG	#N/A	400	0.150664
TGGGAAA	#N/A	401	0.165588
CGTAACC	#N/A	402	0.169109
ACAAAGA	miR-6844	403	0.180054
CTTCAAC	#N/A	404	0.182058
TCCATGA	#N/A	405	0.182185
CCATATG	#N/A	406	0.183272
CGAAGTC	#N/A	407	0.207793
TCAACAA	#N/A	408	0.228056
AGTCAAG	#N/A	409	0.245259
GGTCTAC	#N/A	410	0.251192
GTCGATG	#N/A	411	0.25438
TCAAAGA	#N/A	412	0.27682
TAGAAGG	#N/A	413	0.278669
TGTCGAT	#N/A	414	0.281462
TGGTCGA	#N/A	415	0.318855
TACGAAG	#N/A	416	0.321822
CTTATGC	#N/A	417	0.331815
CAATCTC	miR-5186	418	0.351444
TCATAGC	#N/A	419	0.364014
TATCTAC	miR-3935	420	0.366088
CTAGAAG	#N/A	421	0.371896
GTCATAG	#N/A	422	0.37524
TGCAGAT	#N/A	423	0.39038
GTTGTGA	#N/A	424	0.422164
GGAAATC	#N/A	425	0.487658
TCAGTCA	miR-3136-5p	426	0.512155
TCCATAC	#N/A	427	0.519414
ATAGACC	#N/A	428	0.548849
AGGTCAT	#N/A	429	0.565114
CGATGAA	#N/A	430	0.578473
ACCAACA	#N/A	431	0.587134
TCTCATC	#N/A	432	0.597215
CTGCAAT	#N/A	433	0.600582
ACACTGC	miR-6499-3p	434	0.608419
GTTCAAC	#N/A	435	0.611215
ACCATAC	#N/A	436	0.61206
GGCGAAA	#N/A	437	0.644912
ATGCCCG	#N/A	438	0.656577
TGCAAAC	#N/A	439	0.670185
AACTCAA	#N/A	440	0.672827
TCAGACA	#N/A	441	0.690255
CAAGTCT	#N/A	442	0.742288
GCAATGC	#N/A	443	0.796705
GAAGTCC	#N/A	444	0.798589
CAGTCAA	#N/A	445	0.803895
GACTATC	#N/A	446	0.826173
CCTAGAA	#N/A	447	0.866827
GAGTTGG	#N/A	448	0.873993
TGATCTC	#N/A	449	0.886221
ATCTCAA	#N/A	450	0.889683
CCATTCT	#N/A	451	0.893277
TACTTCC	#N/A	452	0.893584
TGAATGC	#N/A	453	0.895829
AGCGCAA	#N/A	454	0.932326
CTCAAAG	#N/A	455	0.950806
TAAGGGT	#N/A	456	0.971611
TATGACT	#N/A	457	0.988864
AATCATC	#N/A	458	1.01029
ATTGTCG	#N/A	459	1.01267
TTCAGAC	#N/A	460	1.01834
AAGAGTG	#N/A	461	1.0314
AACTCAG	miR-4682	462	1.05612
TCCTAGA	#N/A	463	1.07072
GCGATGT	#N/A	464	1.12448
GGGTAGT	#N/A	465	1.13556
GCATGAA	#N/A	466	1.15133
CACAAGT	#N/A	467	1.18955
CAATCAA	#N/A	468	1.19315
AATCAAA	#N/A	469	1.20666
AGGTCAA	#N/A	470	1.21058
GTGCTAC	#N/A	471	1.232
CATATCT	#N/A	472	1.2781
ATCTACA	#N/A	473	1.31175
AGATTGG	#N/A	474	1.32137
TGGTCTA	#N/A	475	1.37412
TGAAGTC	#N/A	476	1.4419
TTCAACA	miR-653-5p	477	1.44476
TTCCTAG	#N/A	478	1.48748
TATGCTC	#N/A	479	1.52075
TCTTCAA	#N/A	480	1.5248
GCAATCA	#N/A	481	1.53659
CATTCTT	#N/A	482	1.58565
TTGTACG	#N/A	483	1.65296
CTGATCT	#N/A	484	1.65878
ATGCAGA	#N/A	485	1.67175
GTTGGTG	#N/A	486	1.70964
GGTACTA	#N/A	487	1.71151
CATGAAG	#N/A	488	1.72585
AGAGAAT	#N/A	489	1.72628
AGCATGA	#N/A	490	1.74423
GGACCTA	#N/A	491	1.77726
ATCCAGT	miR-1243	492	1.81879
GTGAATG	#N/A	493	1.84001
TGTTCAA	#N/A	494	1.84429
CTCACAA	#N/A	495	1.85557
CCTTACA	#N/A	496	1.88113
ACAAGTC	#N/A	497	1.8866
TCACAAG	#N/A	498	1.90831
GTCTTTG	#N/A	499	1.93493
TACCACA	#N/A	500	1.95704
CACAACT	#N/A	501	1.97639
CAAACCA	#N/A	502	1.99342
CAAAGGT	miR-6782-3p	503	2.01927
ATGCTGA	#N/A	504	2.03942
TAGTCCC	#N/A	505	2.08829
TTAGTCC	#N/A	506	2.10028
CAGGTAG	#N/A	507	2.10766
GGAAAGA	#N/A	508	2.13406
TAGCAAG	#N/A	509	2.15274
GGTGCTA	miR-5682	510	2.15704
ATTGGGG	#N/A	511	2.15918
GTGATTC	#N/A	512	2.17131
CAATGCA	miR-33a-5p	513	2.20312
GATAATC	#N/A	514	2.21147
ACAGCTA	#N/A	515	2.21982
AAGACTG	#N/A	516	2.22107
ATTCTTC	#N/A	517	2.22433
GTAGTGC	#N/A	518	2.26079
GGTAGTG	miR-4999-3p	519	2.27624
CCATACT	#N/A	520	2.32051
TGCAATG	#N/A	521	2.34512
TTGTCCA	#N/A	522	2.37833
CTTGGTC	#N/A	523	2.38518
AAGTGAG	#N/A	524	2.4041
ACTTCCT	#N/A	525	2.41307
CCACTAA	#N/A	526	2.43274
GAAGTCT	#N/A	527	2.46051
TTCATGC	#N/A	528	2.46761
GAGCATA	#N/A	529	2.47399
TACAAAG	#N/A	530	2.47735
CTTATGA	#N/A	531	2.47854
GTTGCAA	#N/A	532	2.4801
AAAAGTC	#N/A	533	2.49219
GTGGATC	#N/A	534	2.49329
TTCAGCA	#N/A	535	2.49521
CACCATA	#N/A	536	2.53795
AAACCAA	#N/A	537	2.57547
ACATATC	miR-190a-5p	538	2.57931
CTGGAAA	#N/A	539	2.58107
GTCATGT	#N/A	540	2.6617
ATGACTT	#N/A	541	2.66633
AATTGTC	#N/A	542	2.71639
CCAGGTA	#N/A	543	2.71984
ATACTTC	#N/A	544	2.76033
AATTCTC	#N/A	545	2.76167
AACATGG	miR-4716-5p	546	2.7632
TGTGGAT	#N/A	547	2.76894
ACAAGTG	miR-6500-3p	548	2.78333
ACTCAAA	#N/A	549	2.80415
AGATACC	#N/A	550	2.80454
GACCTAT	#N/A	551	2.84135
ATAGACT	#N/A	552	2.86309
AATTCAT	#N/A	553	2.92797
GCAGATT	#N/A	554	2.93704
AGTGTGA	#N/A	555	2.95047
CAGGGTT	miR-6732-3p	556	3.00176
GACAAGT	#N/A	557	3.00253
TCAGTAC	#N/A	558	3.00612
GGATTGA	#N/A	559	3.07088
CTATGTG	#N/A	560	3.14489
GGTAGAA	#N/A	561	3.15818
AAATCCA	#N/A	562	3.16014
GAAACTC	#N/A	563	3.16656
TGCTACA	#N/A	564	3.1733
TTGTGAC	#N/A	565	3.18649
CAATGTT	#N/A	566	3.24093
CATATGT	miR-5580-3p	567	3.26465
AGGAAAG	miR-3124-3p	568	3.33424
AAAGAGG	#N/A	569	3.33747
AGGGTTA	#N/A	570	3.36404
ACCTATG	#N/A	571	3.37512
TGCCACT	#N/A	572	3.40487
TTGTTCA	#N/A	573	3.41891
AGTCATG	#N/A	574	3.44709
ATTGTCC	#N/A	575	3.44974
ATCATAG	#N/A	576	3.46999
GTATCAA	#N/A	577	3.50009
TGACTAT	#N/A	578	3.50663
GTCAAAT	#N/A	579	3.51157
GATACCA	#N/A	580	3.51777
AATAGAC	#N/A	581	3.56121
GGAGTTG	#N/A	582	3.58683
GGAACAA	#N/A	583	3.6287
GACTTTG	#N/A	584	3.64555
AAGGGTA	#N/A	585	3.65831
TTGGTGG	#N/A	586	3.67298
TGTATGA	miR-485-3p	587	3.67937
CACCTCA	#N/A	588	3.70133
GCAATGT	#N/A	589	3.70259
AGAGTGA	miR-6794-3p	590	3.77954
CTCAGTA	#N/A	591	3.78169
AAGAATC	#N/A	592	3.78602
AGCAATC	#N/A	593	3.80332
TCTTTGA	#N/A	594	3.84513
GTACCAC	#N/A	595	3.86261
GAATCAT	#N/A	596	3.86683
GTGACTA	#N/A	597	3.90197
GAAATCC	miR-876-5p	598	3.91549
CTACAAA	#N/A	599	3.96192
CTATCCA	#N/A	600	3.96738
CCAACAT	miR-4781-3p	601	4.00689
TCATGCT	#N/A	602	4.05088
ATGGGAA	#N/A	603	4.06659
GTGGATT	#N/A	604	4.07036
GATTGCA	#N/A	605	4.07045
TACAATC	miR-508-3p	606	4.07702
GAAACAG	#N/A	607	4.08095
GGGTTAA	#N/A	608	4.09483
GGAAAAG	#N/A	609	4.13002
TATGCCC	miR-3945	610	4.20018
ACAAATG	#N/A	611	4.22749
GATCAAA	#N/A	612	4.25093
ATCAAAC	#N/A	613	4.27393
AAAGTCT	#N/A	614	4.28194
GTGTGAA	#N/A	615	4.31187
AATCCAG	miR-378j	616	4.34418
TTGCAGA	#N/A	617	4.34726
TTCTTCA	#N/A	618	4.35575
AATAAAT	#N/A	619	4.36551
GCTTATG	#N/A	620	4.44414
CAAAGAT	#N/A	621	4.4495
CCTTGAT	#N/A	622	4.48084
TGCTTTC	#N/A	623	4.48223
TTGGTCT	#N/A	624	4.50618
TTAGTCT	#N/A	625	4.56239
TCCTTGA	miR-561-5p	626	4.59248
GTCTTAT	#N/A	627	4.62025
CATTGCA	miR-106a-3p	628	4.6839
TATGTGA	#N/A	629	4.71852
ACAATCT	#N/A	630	4.73205
AACCAAC	#N/A	631	4.83721
ACTGCAC	miR-143-5p	632	4.85487
GCCTTAC	#N/A	633	4.91928
AGATTGC	#N/A	634	4.96218
TCAAGTG	#N/A	635	4.9971
CAACATA	#N/A	636	5.01148
AAAGACT	#N/A	637	5.05112
CTTTGGA	#N/A	638	5.05604
GTTTATC	#N/A	639	5.06195
GAATTGT	#N/A	640	5.22119
ATTCATG	#N/A	641	5.23884
ACTACAG	miR-20b-3p	642	5.24003
ATCCTGT	#N/A	643	5.42221
TGACAGT	#N/A	644	5.43876
ATAGAAG	#N/A	645	5.48172
GCTACAA	#N/A	646	5.48303
AACACTG	#N/A	647	5.54567
CTACAAT	#N/A	648	5.54989
TGTAGTG	#N/A	649	5.55331
GGTAGTT	#N/A	650	5.59184
GTTGGAT	#N/A	651	5.74422
GAAGAAT	#N/A	652	5.79491
AGTTAGT	miR-4637	653	5.8628
ACTATCC	#N/A	654	5.91703
TTTGTTC	#N/A	655	5.93808
AGTTGTG	#N/A	656	6.00438
TTCTTGG	#N/A	657	6.04177
TAGTACA	#N/A	658	6.0557
TTAGTAC	#N/A	659	6.0608
AGACAAA	#N/A	660	6.08906
GAATGCT	miR-1179	661	6.1188
GAACAAA	#N/A	662	6.14348
TGACTTT	#N/A	663	6.22053
GTACTGA	#N/A	664	6.25168
ACTTTCT	#N/A	665	6.30905
CTTCTTA	miR-3653-3p	666	6.40136
TACCACT	#N/A	667	6.41998
CACTGCA	#N/A	668	6.47927
AAGTGCT	#N/A	669	6.50464
GTTAGTA	#N/A	670	6.5755
AGAATCA	#N/A	671	6.58126
TGTGAAT	#N/A	672	6.63449
AACAAGT	#N/A	673	6.7067
GACTGTT	miR-212-3p	674	6.71822
TAGCAGC	#N/A	675	6.77054
ATGGTAG	#N/A	676	6.82981
CTGAAAC	#N/A	677	6.85285
ACTCAGT	#N/A	678	6.8532
GGTCATA	#N/A	679	6.85741
TTATCAA	#N/A	680	6.85878
GGATAAT	#N/A	681	6.91664
TCAAAGT	#N/A	682	6.92819
TGAATGG	#N/A	683	6.95149
AAGTAGA	#N/A	684	6.96766
CAAATAG	#N/A	685	6.96966
AAAACAG	#N/A	686	7.05482
ACTTTTC	#N/A	687	7.10601
AGTAATA	#N/A	688	7.14502
GACAAAT	#N/A	689	7.17918
AGACTGT	#N/A	690	7.20222
CTTACAG	#N/A	691	7.21065
TGAATTG	#N/A	692	7.23426
TCATTGC	#N/A	693	7.29512
AATGTTG	#N/A	694	7.31339
AGTCTTG	#N/A	695	7.33501
TAGTGCT	#N/A	696	7.33533
TCAAACT	#N/A	697	7.3408
GTCAAGT	#N/A	698	7.43494
CATAGCA	#N/A	699	7.46205
GTAGTTA	#N/A	700	7.46723
GATTTTC	#N/A	701	7.52813
TACTACA	#N/A	702	7.53045
TTTCAGC	#N/A	703	7.53615
TTTCTGA	#N/A	704	7.54233
GTACTAC	#N/A	705	7.56376
AACAGAA	miR-4652-3p	706	7.5671
TATCAAA	#N/A	707	7.58533
TGAAACA	#N/A	708	7.60326
TATGTTG	#N/A	709	7.66304
TTTATCA	#N/A	710	7.70465
GATTGAA	#N/A	711	7.71627
CAGAATT	#N/A	712	7.74769
TATCAGT	#N/A	713	7.86482
TACTTAC	#N/A	714	7.87143
AAACTCA	#N/A	715	7.96502
ATGAAGT	#N/A	716	8.01728
AACCATA	miR-584-5p	717	8.05587
TTGAAGC	#N/A	718	8.08243
GTAATAG	#N/A	719	8.09372
AAGTGAT	#N/A	720	8.18529
AAGATAC	#N/A	721	8.19521
TTATGAA	#N/A	722	8.20679
GGAAATT	#N/A	723	8.23359
ATAATCA	#N/A	724	8.29991
TGGTAGA	#N/A	725	8.34582
AAACAGA	#N/A	726	8.37475
CAGTCAT	#N/A	727	8.4067
TTCTCAT	#N/A	728	8.42586
TGTTGGT	#N/A	729	8.46411
TTTAGTC	#N/A	730	8.52109
TTGTAGC	miR-187-5p	731	8.71968
TCAAATA	#N/A	732	8.76812
CATGAAA	#N/A	733	8.77311
AGTACAG	#N/A	734	8.79369
GAATGGT	#N/A	735	8.80948
AGTCTTT	miR-548u	736	8.88325
ACTATCA	#N/A	737	8.89262
GTGCCTT	miR-124-3p	738	8.90193
AATGCAG	miR-20a-3p	739	8.98854
CACTAAA	#N/A	740	9.00753
TGATGAA	#N/A	741	9.01219
TCTTGGT	#N/A	742	9.01406
AAACAAA	#N/A	743	9.03498
GTGTATT	#N/A	744	9.10175
ACAGAAT	miR-4778-5p	745	9.12953
GTATTCC	#N/A	746	9.15311
GCATTTC	#N/A	747	9.27173
TGTTGTT	#N/A	748	9.30911
GCAGTTG	#N/A	749	9.33565
GAAAAGA	#N/A	750	9.3499
ATGTGAA	#N/A	751	9.42756
GAGCTTA	#N/A	752	9.44108
TTGGATA	#N/A	753	9.45189
TCAAAAC	miR-2052	754	9.49239
AGTCTTA	miR-499a-5p	755	9.56059
TTGAGAT	#N/A	756	9.75078
GAAAAGT	miR-5003-3p	757	9.77139
ACAGTTG	#N/A	758	9.78676
GGGAAAT	#N/A	759	9.8035
ATGTTGG	#N/A	760	9.80582
GAGAATA	#N/A	761	9.84725
GATGAAT	#N/A	762	9.85943
ACAGATT	#N/A	763	9.86621
GCATATT	#N/A	764	9.89453
GTAGAAA	#N/A	765	9.91478
GTAGTGT	#N/A	766	9.95327
ACCATAT	#N/A	767	10.1165
GTAGCAA	#N/A	768	10.1408
AGGTAGT	#N/A	769	10.1437
TTACAGG	#N/A	770	10.1633
TAGAAAC	#N/A	771	10.1634
GTTTAAT	#N/A	772	10.1917
ATTTAGT	#N/A	773	10.2001
TCTTATG	#N/A	774	10.2218
ATCAAAA	#N/A	775	10.3103
TAGTGTG	#N/A	776	10.4282
ATTGCAG	#N/A	777	10.4483
TGTTTAG	#N/A	778	10.4874
AGTGCTT	#N/A	779	10.5516
GAAATTC	#N/A	780	10.5613
AAATAAA	#N/A	781	10.6058
AAGTCTT	miR-8087	782	10.6167
GAAAGAA	#N/A	783	10.7937
TAGACTT	#N/A	784	10.8894
ATTGTAG	#N/A	785	10.9431
ACAACTT	miR-382-5p	786	10.9505
AGCTTAT	#N/A	787	10.9506
TTATGCT	#N/A	788	10.9566
TCAAAAT	#N/A	789	10.975
CTTTCAG	miR-4766-5p	790	10.9888
TCATGTA	#N/A	791	11.127
TATTCCA	miR-6505-5p	792	11.1351
TGGATTG	#N/A	793	11.2429
AGAATTG	#N/A	794	11.2709
AACAAAA	#N/A	795	11.3095
AGACTTT	#N/A	796	11.4335
ATGAATT	miR-4760-3p	797	11.4733
TGTTTAT	#N/A	798	11.5292
AAAAGTG	#N/A	799	11.5489
TCAGTTA	#N/A	800	11.6268
AATCATA	#N/A	801	11.6326
ATGAATA	#N/A	802	11.6622
GTAACCA	#N/A	803	11.7025
GACAGTT	#N/A	804	11.7302
TAAATGC	#N/A	805	11.7516
TGTATTC	#N/A	806	11.8414
CTGTTTG	#N/A	807	11.9797
TGTACCA	miR-150-3p	808	11.9978
TATTAGC	#N/A	809	12.0054
CACTGAA	#N/A	810	12.0183
TTGTACC	#N/A	811	12.1114
TTATGCC	#N/A	812	12.1144
CTTGATT	#N/A	813	12.1162
TGTATCA	#N/A	814	12.2057
AAAGTGA	#N/A	815	12.2312
TTTCCTA	#N/A	816	12.2498
ATATTAG	#N/A	817	12.3202
AGAAACT	#N/A	818	12.3221
CAGTTGT	#N/A	819	12.3266
TGTGTAT	#N/A	820	12.3272
CATGTAT	#N/A	821	12.3341
AACATAT	#N/A	822	12.3406
TGAAAAG	#N/A	823	12.4199
ATTGAAG	#N/A	824	12.5118
TTAGCAA	#N/A	825	12.5848
AGATTGT	#N/A	826	12.6765
TGGAAAT	#N/A	827	12.8177
GTTAAAG	miR-302b-5p	828	12.8535
TAGCAAT	#N/A	829	12.8582
TTGTAGT	#N/A	830	12.978
ATGTTGC	#N/A	831	13.0018
GGTTAAA	miR-552-5p	832	13.2181
TAATTCA	miR-183-3p	833	13.4101
ATACTTA	#N/A	834	13.4321
TAATAGA	#N/A	835	13.446
TAGTCTT	#N/A	836	13.4603
GGTTTAA	#N/A	837	13.4892
GAAACTA	#N/A	838	13.5321
ATTAGCA	#N/A	839	13.5977
TGGATAA	#N/A	840	13.7152
AATGGTA	#N/A	841	13.7168
ATAGCAG	#N/A	842	13.7244
CCATTTA	#N/A	843	13.7586
GAAGAAA	#N/A	844	13.8303
GAAAAAC	#N/A	845	13.8395
AAATAGA	#N/A	846	13.8771
AATGCTG	miR-4310	847	13.8869
ACTTTGT	#N/A	848	13.9398
AAAAGAG	#N/A	849	14.3761
GCTTTTC	#N/A	850	14.5391
TTCATTG	#N/A	851	14.5468
AAAGATA	#N/A	852	14.8653
AGTGATT	miR-34b-3p	853	14.8841
ATGTATC	#N/A	854	14.8991
ATATTAT	miR-5692c	855	14.9078
AGCATAT	#N/A	856	14.9686
CTTGGTT	#N/A	857	15.102
TTGCAAA	miR-450b-5p	858	15.1211
TGCTGTT	#N/A	859	15.1486
ATACCAT	#N/A	860	15.2221
GTTTAGT	#N/A	861	15.2755
TTTGGGT	#N/A	862	15.2981
CATATTA	#N/A	863	15.3318
AACTTGT	#N/A	864	15.4027
AGTACTG	#N/A	865	15.4793
CATACTT	#N/A	866	15.5987
ACTAAAA	#N/A	867	15.6058
ATTGCAT	#N/A	868	15.8788
AAAAACA	#N/A	869	15.9933
ACCATTT	miR-224-3p	870	16.0503
AAAGTAG	#N/A	871	16.2418
ACTTGTA	#N/A	872	16.3711
ACAAAAC	#N/A	873	16.4131
TAGAAGT	#N/A	874	16.5078
TCTGAAA	#N/A	875	16.5262
CTTTTCA	#N/A	876	16.6467
TTGTGTA	#N/A	877	16.6774
AAACACT	#N/A	878	16.8748
AATTTAG	#N/A	879	16.8966
GAAATTG	#N/A	880	16.9025
ATTATGT	#N/A	881	16.9881
TGTAGCA	#N/A	882	17.0318
TTGTATG	#N/A	883	17.0779
TAGTTAA	#N/A	884	17.0783
AATAGAA	miR-4482-3p	885	17.1834
GTGCTTT	miR-6835-3p	886	17.2405
TTTGTAC	#N/A	887	17.3531
TAATCAT	#N/A	888	17.3827
CTTGTAT	miR-381-3p	889	17.3897
AAGTAAT	#N/A	890	17.3904
CAGTACT	miR-1278	891	17.6066
GAAACAA	#N/A	892	17.664
TTAATAG	#N/A	893	17.7336
GTTTGTT	miR-495-3p	894	17.7392
TTGTTTA	#N/A	895	17.807
AAGCAGT	#N/A	896	17.8107
AACAGAT	#N/A	897	17.8942
AAGAAAC	#N/A	898	17.9906
AACTTTG	#N/A	899	18.0177
CCTTTTG	#N/A	900	18.1372
TAACCAT	#N/A	901	18.1772
TTCTGAA	#N/A	902	18.2506
ATAACTT	#N/A	903	18.496
AGTTGGA	#N/A	904	18.5054
CAACTTT	#N/A	905	18.569
TTAATTC	#N/A	906	18.6711
TGTTTGT	#N/A	907	18.9758
AGAATAT	#N/A	908	18.9813
TATAACT	#N/A	909	19.1733
TCAGATT	#N/A	910	19.2127
TGCATTT	#N/A	911	19.344
CTAAAAG	#N/A	912	19.382
CAAAATT	#N/A	913	19.3895
AAACTAT	#N/A	914	19.4062
TGCCTTT	miR-548an	915	19.4625
TTGAAGA	#N/A	916	19.5828
TTTGGAA	#N/A	917	19.6976
TTTTGTA	#N/A	918	19.6977
AACTATC	#N/A	919	19.7365
AGCAGTT	#N/A	920	20.1703
ACTTGTT	#N/A	921	20.2169
CAAAACA	#N/A	922	20.2851
AGCCTTA	#N/A	923	20.4098
TATGTTT	#N/A	924	20.5126
TGGAAAA	#N/A	925	20.9046
CAAAATA	#N/A	926	20.9101
TTCTTAT	#N/A	927	20.9198
ATATGTT	#N/A	928	21.0381
TTTGTAG	miR-1283	929	21.074
GAATATA	#N/A	930	21.0929
GAATATT	#N/A	931	21.2665
TACCATT	#N/A	932	21.2929
AAATTCT	#N/A	933	21.3495
ATAAATT	#N/A	934	21.3611
CAAAACT	#N/A	935	21.3637
ATGAAAT	#N/A	936	21.4368
TAAAAGT	#N/A	937	21.5794
AATACTT	#N/A	938	21.6106
TACTTGT	#N/A	939	21.8974
TATTATG	#N/A	940	22.1096
ATATCTA	#N/A	941	22.6959
AAAACAC	#N/A	942	22.7717
TTTGAGA	#N/A	943	22.9699
AATTGAA	#N/A	944	23.0529
CTTTTGT	#N/A	945	23.0709
TTATGTT	miR-4803	946	23.2986
TGGTTTA	#N/A	947	23.3805
CAAAGTA	#N/A	948	23.4271
CAAATGA	miR-579-3p	949	23.4989
TTTCTTG	#N/A	950	23.8011
ATACTTG	#N/A	951	23.8637
AAATTGA	#N/A	952	23.9886
ACAAAAT	#N/A	953	24.0231
GTTTTGA	#N/A	954	24.556
TTGCATT	#N/A	955	24.6088
TAAAGTA	#N/A	956	24.9739
TTGGAAA	#N/A	957	25.0253
AAATGCT	#N/A	958	25.3417
TGAATAT	miR-6074	959	25.3471
GAAAAAA	#N/A	960	25.4561
CTGAAAA	#N/A	961	25.4855
AGTTAAA	#N/A	962	25.593
ATTGTAC	#N/A	963	25.6365
ATTTTGA	#N/A	964	25.699
TTAAAGT	#N/A	965	26.1253
TTGATTT	miR-551b-5p	966	26.1491
AAAAATA	#N/A	967	26.3001
AAATACT	#N/A	968	26.3264
GAAACTT	#N/A	969	26.4965
GCCTTTT	#N/A	970	26.6258
ATATAAC	#N/A	971	26.8234
TGATTTT	#N/A	972	26.9153
TTTAATA	#N/A	973	26.9939
TTTCAGA	#N/A	974	27.2638
ATCAGTT	#N/A	975	27.4374
AAACTTT	miR-561-3p	976	27.4997
AATATTA	#N/A	977	27.5649
ATTTTCT	#N/A	978	27.9893
TTTGAAG	#N/A	979	28.2806
CTTGTTT	#N/A	980	28.4071
CTTTGTA	miR-524-5p	981	28.5538
TTAAATG	#N/A	982	28.7477
AAACTTG	#N/A	983	28.7652
TTTTCAG	#N/A	984	28.9464
AACTTTT	#N/A	985	29.0562
ACTGAAA	miR-30a-3p	986	29.3185
ATTGAAA	#N/A	987	29.4178
GTTAAAT	#N/A	988	30.6304
AATGAAA	#N/A	989	30.6569
TTGGTTT	#N/A	990	31.8707
ATGTTTA	#N/A	991	32.3716
AAAATGC	#N/A	992	32.6984
TTTCATT	#N/A	993	32.9197
AAAGAAA	#N/A	994	33.341
AATTTTG	#N/A	995	33.6577
AAAATAA	#N/A	996	33.7874
TGAAAAT	#N/A	997	34.4104
AAAATAC	#N/A	998	34.8863
TACTGAA	#N/A	999	35.4292
TTTTCAT	#N/A	1000	35.5311
AATATAA	#N/A	1001	35.8161
GAAAATG	miR-1250-3p	1002	35.934
TTGAAAA	#N/A	1003	36.6018
TTTAATT	#N/A	1004	37.243
AAATTTA	#N/A	1005	37.5315
AATGCTT	#N/A	1006	38.6939
GAAAAAT	#N/A	1007	38.7026
TGAAATT	#N/A	1008	38.776
AAAACTT	#N/A	1009	38.969
ATGCTTT	miR-4422	1010	39.1367
TTTTGAA	#N/A	1011	39.6791
AAAGTAA	#N/A	1012	41.2034
AAAAAAT	#N/A	1013	41.2152
ATGAAAA	miR-335-3p	1014	42.4355
AAAAATT	#N/A	1015	43.2085
TAAATTT	#N/A	1016	43.4456
TGAAAAA	#N/A	1017	44.7781
TAACTTT	miR-548at-5p	1018	45.2907
AAATGAA	#N/A	1019	45.3212
AATTGTA	#N/A	1020	46.393
AAATTGT	#N/A	1021	48.8084
ATTTAAT	#N/A	1022	49.0469
ACTGTTT	#N/A	1023	50.6882
TGCTTTT	miR-548e-5p	1024	51.458
CATTTAA	#N/A	1025	51.4843
TTTTCTT	#N/A	1026	52.583
AAAATTG	#N/A	1027	57.8665
AAAATTT	#N/A	1028	60.5435
TGTTTTG	#N/A	1029	61.8257
TTTGAAA	#N/A	1030	63.1807
AAATTTT	miR-4282	1031	63.6212
TTGTTTT	#N/A	1032	79.4969
