# Supplementary material for: circHIPK3 nucleates IGF2BP2 and functions as a competing endogenous RNA
Source: eLife. 2024 Jul 23;13:RP91783. doi: 10.7554/eLife.91783 (PMC11265796; doi:10.7554/eLife.91783)
Supplement: Supplementary file 5. [file elife-91783-supp5.xlsx]

## Sheet: Sheet1
Table S5
RBP.name	ENSGID	Nuclei	Cytoplasm
GRWD1	ENSG00000105447	1	1
IGF2BP1	ENSG00000159217	1	1
IGF2BP2	ENSG00000073792	1	1
U2AF1	ENSG00000160201	1	0
U2AF2	ENSG00000063244	1	0
YBX3	ENSG00000060138	0	1
